# Supplementary material
Source: PubMed Central journal article supplement (PMC5263087)
Supplement: jcsm.13.2.307s1.pdf [file jcsm.13.2.307s1.pdf]

## Literature Search Terms:

((insomnia OR "Sleep Initiation and Maintenance Disorders"[Mesh]) AND ((clinical trial) OR (randomized controlled trial)) NOT "Editorial"[Publication Type] NOT "Letter"[Publication Type] NOT "Comment"[Publication Type] NOT "Case Reports"[Publication Type] NOT "Biography"[Publication Type] NOT "Review"[Publication Type] NOT (transient[TI])) NOT (animals[mh] NOT humans[mh])

## Suvorexant - Summary of Findings Tables

**Table S1** – Summary of Findings table for suvorexant 10 mg for the treatment of chronic insomnia

References: Herring 2012(A)

| Outcomes                                | Quality of the evidence (GRADE)   | Absolute Difference 10 mg Suvorexant vs Placebo                                                                   | No of Participants (studies)  |
|-----------------------------------------|-----------------------------------|-------------------------------------------------------------------------------------------------------------------|-------------------------------|
| <b>Sleep Latency*</b><br>(PSG)          | ⊕⊕⊖⊖<br><b>low</b> <sup>1,2</sup> | The mean sleep latency in the suvorexant group was<br><b>2.3 minutes lower</b><br>(13.68 lower to 9.08 higher)    | 175<br>(1 study) <sup>A</sup> |
| <b>Wake After Sleep Onset*</b><br>(PSG) | ⊕⊕⊖⊖<br><b>low</b> <sup>2,3</sup> | The mean wake after sleep onset in the suvorexant group was<br><b>21.5 minutes lower</b><br>(36.34 to 6.66 lower) | 175<br>(1 study) <sup>A</sup> |
| <b>Sleep Efficiency</b><br>(PSG)        | ⊕⊕⊖⊖<br><b>low</b> <sup>2,4</sup> | The mean sleep efficiency in the suvorexant group was<br><b>4.7 percent higher</b><br>(0.97 to 8.43 higher)       | 175<br>(1 study) <sup>A</sup> |

\* Critical Outcome, used to determine Quality of Evidence

<sup>1</sup> 95% CI (-13.68 to 9.08) crosses the Clinical Significance Threshold (10 min)

<sup>2</sup> Study funded by industry

<sup>3</sup> 95% CI (-36.34 to -6.66) crosses the Clinical Significance Threshold (20 min)

<sup>4</sup> 95% CI (0.97 to 8.43) crosses the Clinical Significance Threshold (5%)

**Table S2** – Summary of Findings table for suvorexant 15/20 mg for the treatment of chronic insomnia

References: Herring 2016(A)

| Outcomes                                 | Quality of the evidence (GRADE)      | Absolute Difference 15/20 mg Suvorexant vs Placebo                                                                 | No of Participants (studies)  |
|------------------------------------------|--------------------------------------|--------------------------------------------------------------------------------------------------------------------|-------------------------------|
| <b>Sleep Latency*</b><br>(PSG)           | ⊕⊕⊖⊖<br><b>low</b> <sup>1,2</sup>    | The mean sleep latency in the suvorexant group was<br><b>8.1 minutes lower</b><br>(13.85 to 2.35 lower)            | 423<br>(1 study) <sup>A</sup> |
| <b>Sleep Latency</b><br>(Subjective)     | ⊕⊕⊕⊖<br><b>moderate</b> <sup>2</sup> | The mean sleep latency in the suvorexant group was<br><b>5.2 minutes lower</b><br>(10.1 to 0.3 lower)              | 567<br>(1 study) <sup>A</sup> |
| <b>Total Sleep Time*</b><br>(Subjective) | ⊕⊕⊕⊖<br><b>moderate</b> <sup>2</sup> | The mean total sleep time in the suvorexant group was<br><b>10.6 minutes higher</b><br>(1.79 to 19.41 higher)      | 567<br>(1 study) <sup>A</sup> |
| <b>Wake After Sleep Onset*</b><br>(PSG)  | ⊕⊕⊖⊖<br><b>low</b> <sup>2,3</sup>    | The mean wake after sleep onset in the suvorexant group was<br><b>16.60 minutes lower</b><br>(24.87 to 8.33 lower) | 567<br>(1 study) <sup>A</sup> |

\* Critical Outcome, used to determine Quality of Evidence

<sup>1</sup> 95% CI (-13.85 to -2.35) crosses Clinical Significance Threshold (10 min)

<sup>2</sup> Study funded by industry

<sup>3</sup> 95% CI (-24.87 to -8.33) crosses Clinical Significance Threshold (20 min)

**Table S3** – Summary of Findings table for suvorexant 20 mg for the treatment of chronic insomnia

References: Herring 2012(A)

| Outcomes                      | Quality of the evidence (GRADE)            | Absolute Difference 20 mg Suvorexant vs Placebo                                                              | No of Participants (studies) |
|-------------------------------|--------------------------------------------|--------------------------------------------------------------------------------------------------------------|------------------------------|
| Sleep Latency* (PSG)          | ⊕⊕⊕⊖ <sup>2</sup><br>moderate <sup>2</sup> | The mean sleep latency in the suvorexant group was <b>22.3 minutes lower</b> (33.77 to 10.83 lower)          | 173 (1 study) <sup>A</sup>   |
| Wake After Sleep Onset* (PSG) | ⊕⊕⊖⊖ <sup>1,2</sup><br>low <sup>1,2</sup>  | The mean wake after sleep onset in the suvorexant group was <b>28.1 minutes lower</b> (43.07 to 13.13 lower) | 173 (1 study) <sup>A</sup>   |
| Sleep Efficiency (PSG)        | ⊕⊕⊕⊖ <sup>2</sup><br>moderate <sup>2</sup> | The mean sleep efficiency in the suvorexant group was <b>10.4 percent higher</b> (6.65 to 14.15 higher)      | 173 (1 study) <sup>A</sup>   |

\* Critical Outcome, used to determine Quality of Evidence

<sup>1</sup> 95% CI (-43.07 to -13.13) crosses Clinical Significance Threshold (20 min)

<sup>2</sup> Study funded by industry

## Eszopiclone - Meta-Analyses and Summary of Findings Tables

**Figure S1** – Meta-analysis of data for PSG-determined sleep latency in response to eszopiclone 2 mg

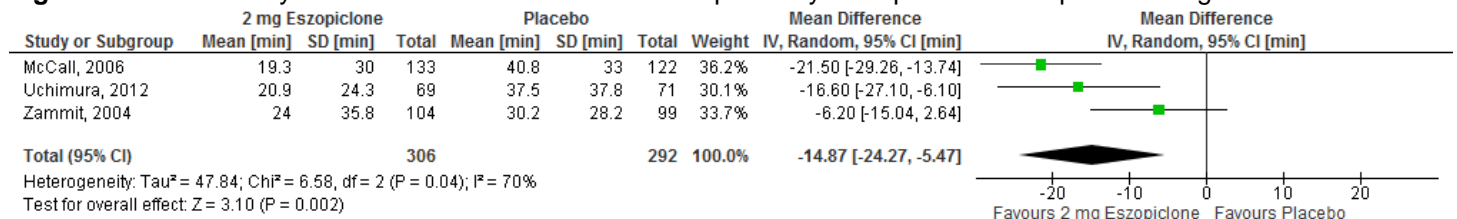

**Figure S2** – Meta-analysis of data for subjectively-determined sleep latency in response to eszopiclone 2 mg

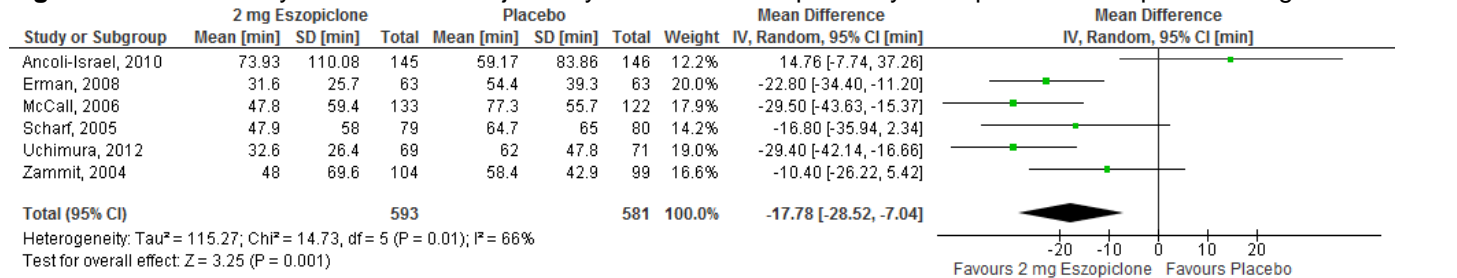

**Figure S3** – Meta-analysis of data for subjectively-determined total sleep time in response to eszopiclone 2 mg

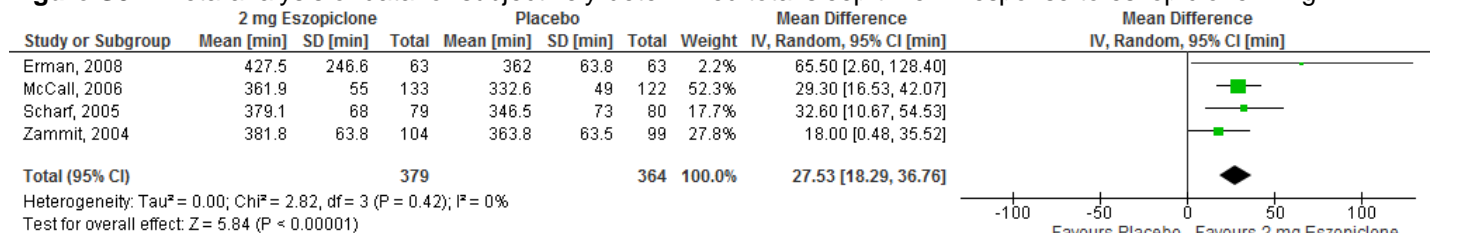

**Figure S4** – Meta-analysis of data for PSG-determined wake after sleep onset in response to eszopiclone 2 mg

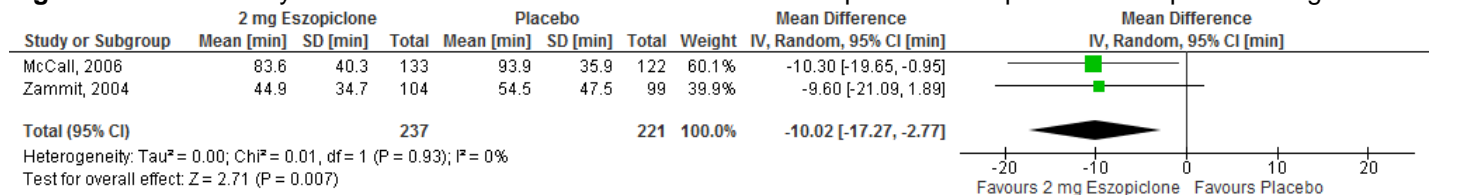

**Figure S5 – Meta-analysis of data for subjectively-determined wake after sleep onset in response to eszopiclone 2 mg**

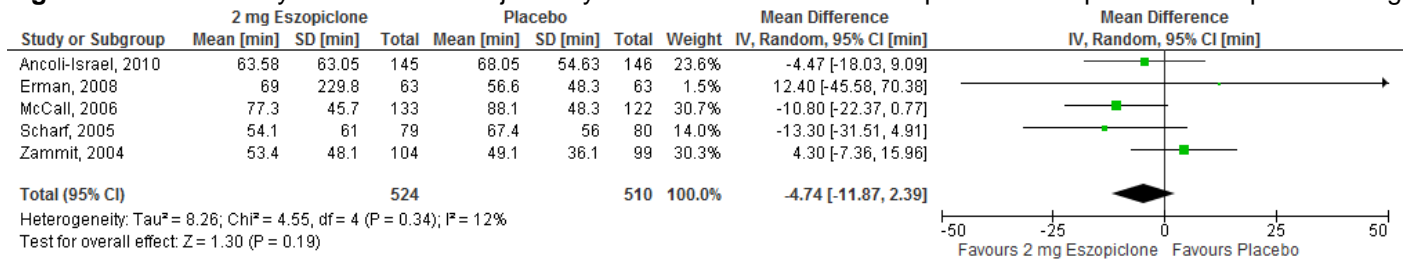

**Figure S6 – Meta-analysis of data for subjectively-determined quality of sleep in response to eszopiclone 2 mg**

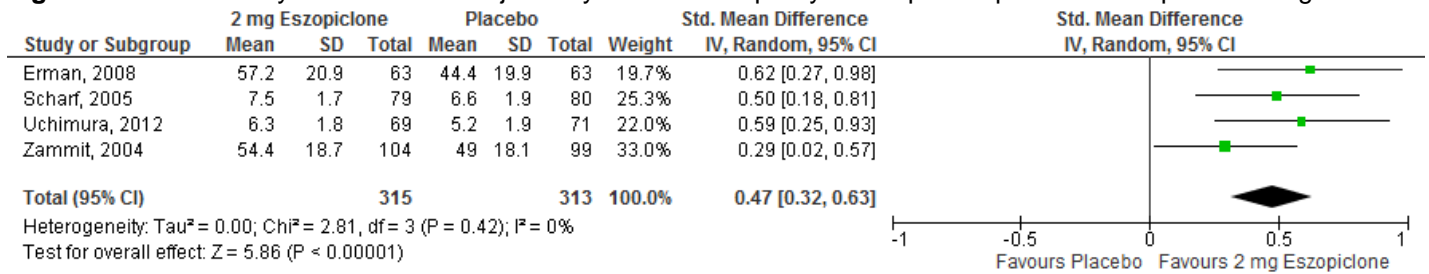

**Figure S7 – Meta-analysis of data for PSG-determined sleep efficiency in response to eszopiclone 2 mg**

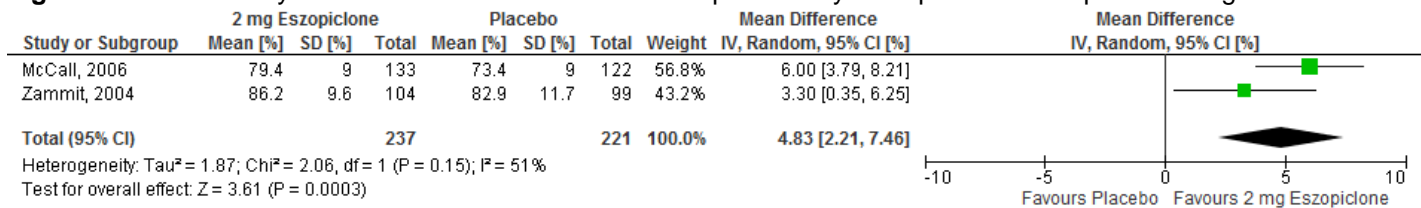

**Figure S8 – Meta-analysis of data for PSG-determined number of awakenings in response to eszopiclone 2 mg**

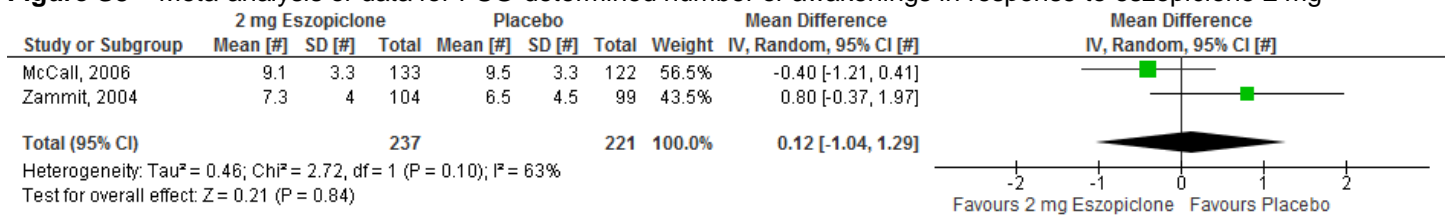

**Figure S9 – Meta-analysis of data for subjectively-determined number of awakenings in response to eszopiclone 2 mg**

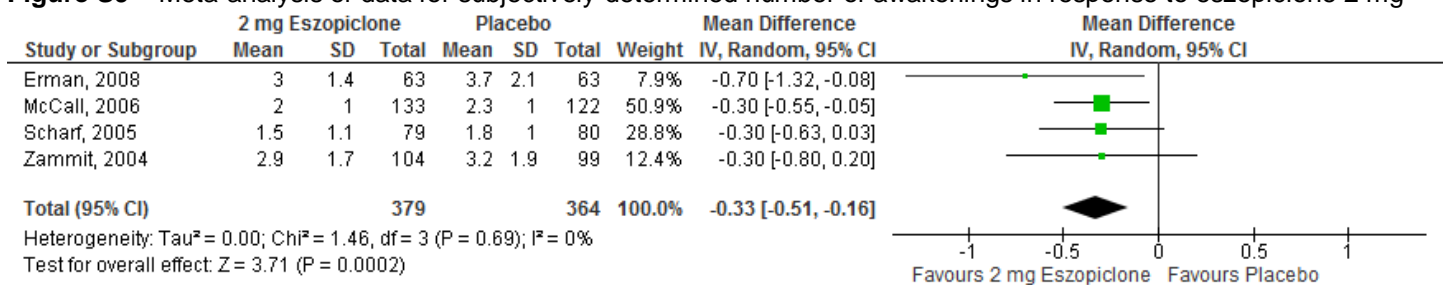

**Figure S10**– Meta-analysis of data for the occurrence of dizziness in response to eszopiclone 2 mg

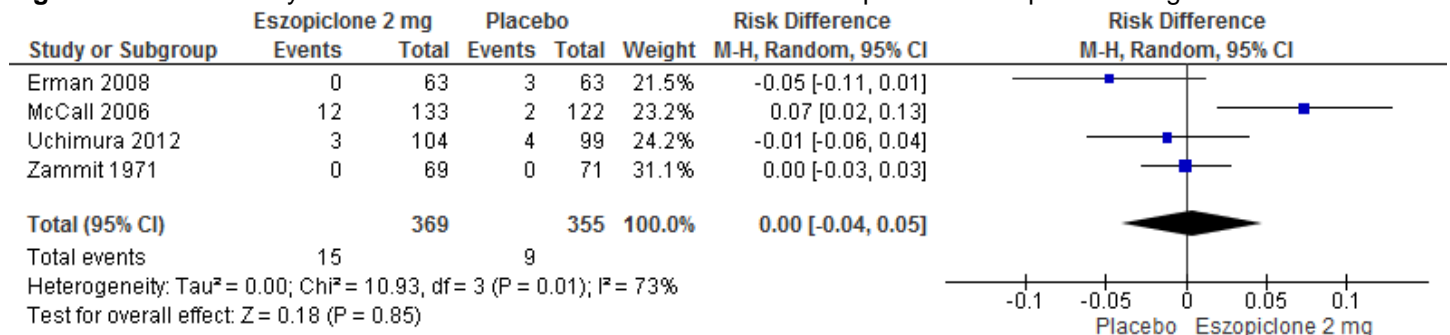

**Figure S11**– Meta-analysis of data for the occurrence of dry mouth in response to eszopiclone 2 mg

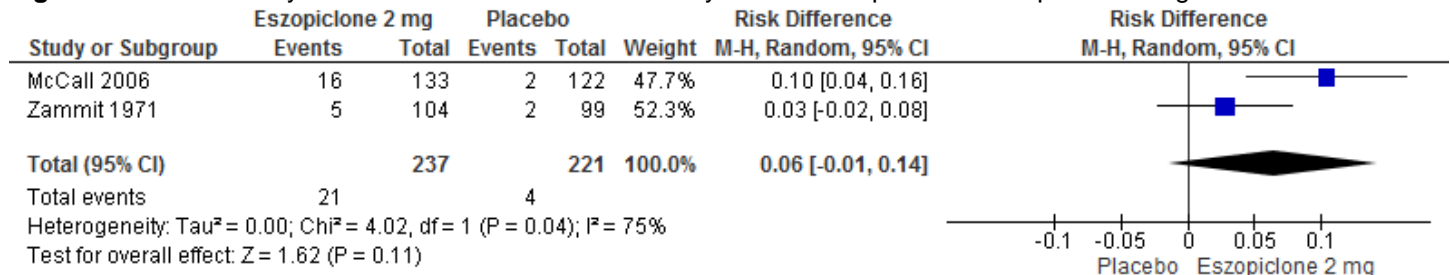

**Figure S12**– Meta-analysis of data for the occurrence of headache in response to eszopiclone 2 mg

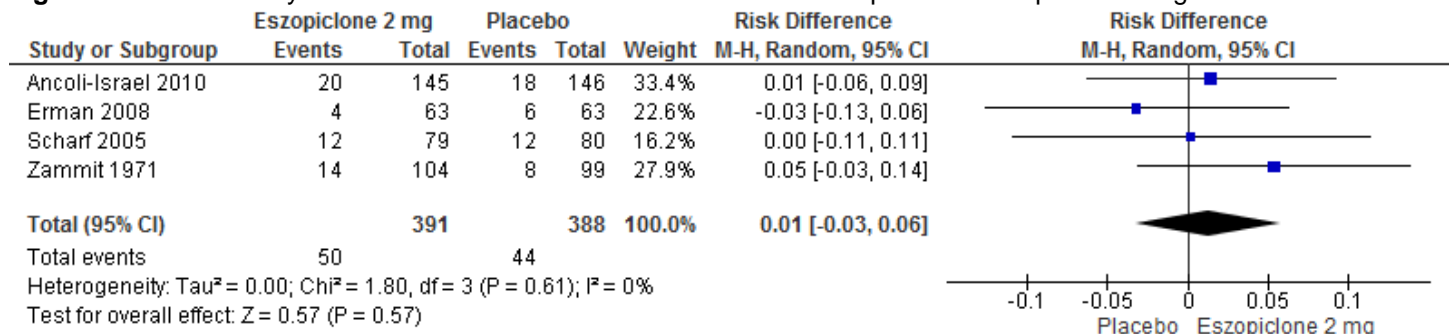

**Figure S13**– Meta-analysis of data for the occurrence of somnolence in response to eszopiclone 2 mg

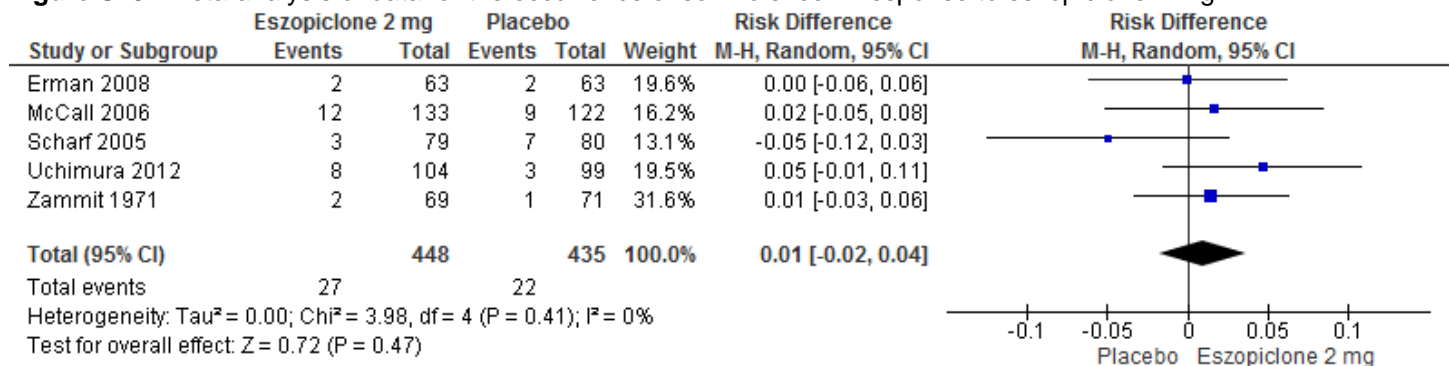

**Figure S14**– Meta-analysis of data for the occurrence of unpleasant taste in response to eszopiclone 2 mg

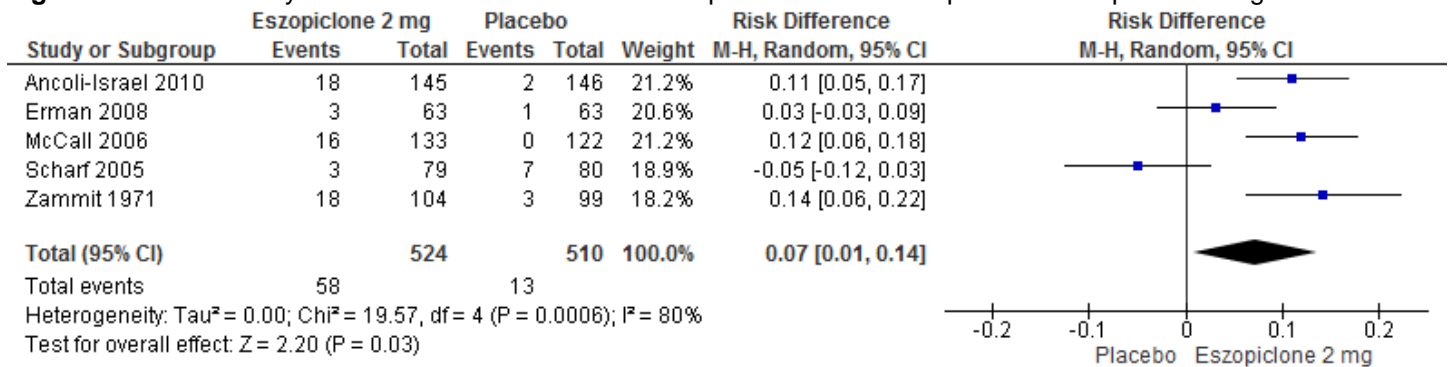

**Table S4** – Summary of Findings table for eszopiclone 2 mg for the treatment of chronic insomnia

**References:** Ancoli-Israel 2010(A); Erman 2008(B); McCall 2006(C); Scharf 2005(D); Uchimura 2012(E); Zammit 2004(F)

| Outcomes                                      | Quality of the evidence (GRADE)        | Absolute Difference 2 mg Eszopiclone vs Placebo                                                                         | No of Participants (studies)               |
|-----------------------------------------------|----------------------------------------|-------------------------------------------------------------------------------------------------------------------------|--------------------------------------------|
| <b>Sleep Latency*</b><br>(PSG)                | ⊕⊕⊕⊖<br><b>low</b> <sup>1,2</sup>      | The mean sleep latency in the eszopiclone groups was <b>14.87 minutes lower</b><br>(24.27 to 5.47 lower)                | 598<br>(3 studies) <sup>C,E,F</sup>        |
| <b>Sleep Latency</b><br>(Subjective)          | ⊕⊕⊕⊖<br><b>low</b> <sup>2,3</sup>      | The mean sleep latency in the eszopiclone groups was <b>17.78 minutes lower</b><br>(28.52 to 7.04 lower)                | 1174<br>(6 studies) <sup>A,B,C,D,E,F</sup> |
| <b>Total Sleep Time*</b><br>(Subjective)      | ⊕⊕⊕⊖<br><b>low</b> <sup>2,4</sup>      | The mean total sleep time in the eszopiclone groups was <b>27.53 minutes higher</b><br>(18.29 to 36.76 higher)          | 743<br>(4 studies) <sup>B,C,D,F</sup>      |
| <b>Wake After Sleep Onset*</b><br>(PSG)       | ⊕⊕⊕⊖<br><b>moderate</b> <sup>2</sup>   | The mean wake after sleep onset in the eszopiclone groups was <b>10.02 minutes lower</b><br>(17.27 to 2.77 lower)       | 458<br>(2 studies) <sup>C,F</sup>          |
| <b>Wake After Sleep Onset</b><br>(Subjective) | ⊕⊕⊕⊖<br><b>moderate</b> <sup>2</sup>   | The mean wake after sleep onset in the eszopiclone groups was <b>4.74 minutes lower</b><br>(11.87 lower to 2.39 higher) | 1034<br>(5 studies) <sup>A,B,C,D,F</sup>   |
| <b>Quality of Sleep*</b><br>(Subjective)      | ⊕⊕⊕⊖<br><b>moderate</b> <sup>2,6</sup> | The mean quality of sleep in the eszopiclone groups was <b>0.47 standard deviations higher</b><br>(0.32 to 0.63 higher) | 628<br>(4 studies) <sup>B,D,E,F</sup>      |
| <b>Sleep Efficiency</b><br>(PSG)              | ⊕⊕⊕⊖<br><b>low</b> <sup>2,5</sup>      | The mean sleep efficiency in the eszopiclone groups was <b>4.83 percent higher</b><br>(2.21 to 7.46 higher)             | 458<br>(2 studies) <sup>C,F</sup>          |
| <b>Sleep Efficiency</b><br>(Subjective)       | ⊕⊕⊕⊖<br><b>moderate</b> <sup>2</sup>   | The mean sleep efficiency in the eszopiclone groups was <b>0.30 percent lower</b><br>(0.79 lower to 0.19 higher)        | 203<br>(1 study) <sup>F</sup>              |
| <b>Number of Awakening</b><br>(PSG)           | ⊕⊕⊕⊖<br><b>moderate</b> <sup>2</sup>   | The mean number awakening in the eszopiclone groups was <b>0.12 awakenings higher</b><br>(1.04 lower to 1.29 higher)    | 458<br>(2 studies) <sup>C,F</sup>          |
| <b>Number of Awakenings</b><br>(Subjective)   | ⊕⊕⊕⊖<br><b>moderate</b> <sup>2</sup>   | The mean number of awakenings in the eszopiclone groups was <b>0.33 awakenings lower</b><br>(0.51 to 0.16 lower)        | 743<br>(4 studies) <sup>B,C,D,F</sup>      |

\* Critical Outcome, used to determine Quality of Evidence

<sup>1</sup> 95% CI (-24.27, -5.47) crosses Clinical Significance (10 min)

<sup>2</sup> All studies funded by industry

<sup>3</sup> 95% CI (-33.81, -6.35) crosses Clinical Significance (20 min)

<sup>4</sup> 95% CI (18.29, 36.76) crosses Clinical Significance (20 min)

<sup>5</sup> 95% CI (2.21, 7.46) crosses Clinical Significance (5%)

<sup>6</sup> 95% CI (0.37, 0.76) crosses Clinical Significance (SMD 0.5)

**Figure S15 – Meta-analysis of data for PSG-determined sleep latency in response to eszopiclone 3 mg**

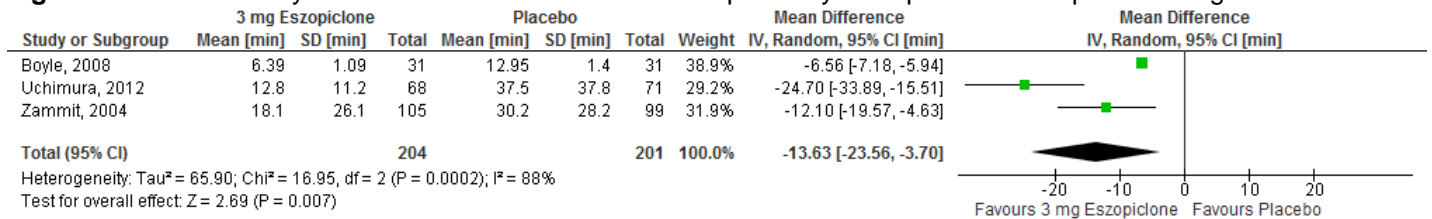

**Figure S16 – Meta-analysis of data for subjectively-determined sleep latency in response to eszopiclone 3 mg**

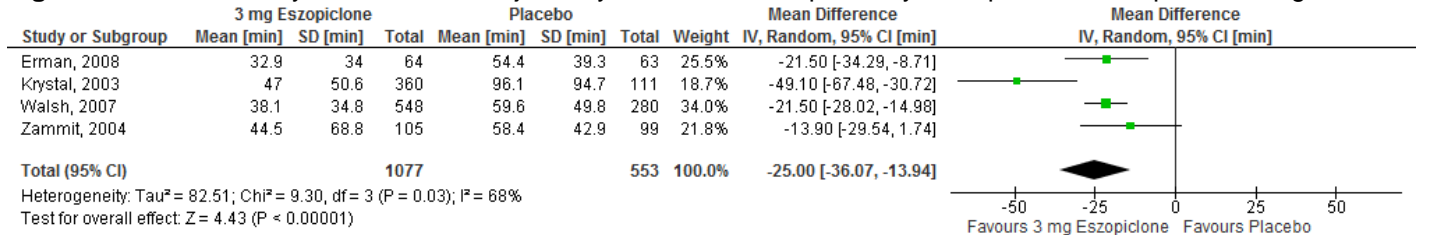

**Figure S17 – Meta-analysis of data for subjectively-determined total sleep time in response to eszopiclone 3 mg**

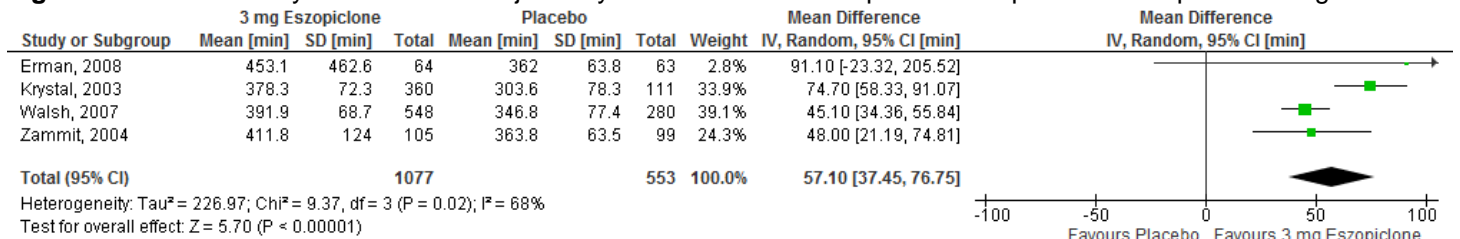

**Figure S18 – Meta-analysis of data for PSG-determined wake after sleep onset in response to eszopiclone 3 mg**

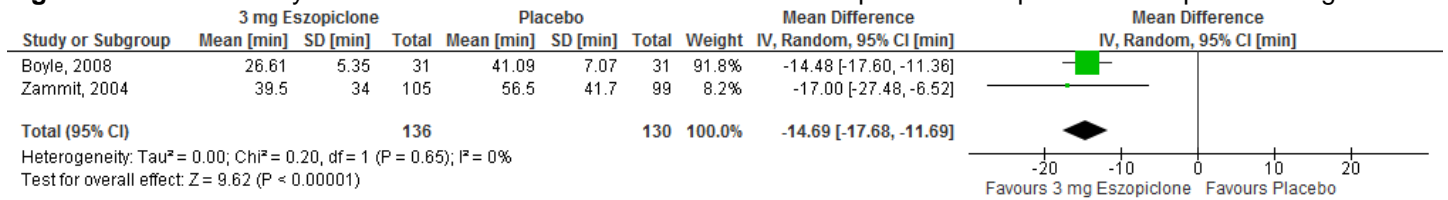

**Figure S19 – Meta-analysis of data for subjectively-determined wake after sleep onset in response to eszopiclone 3 mg**

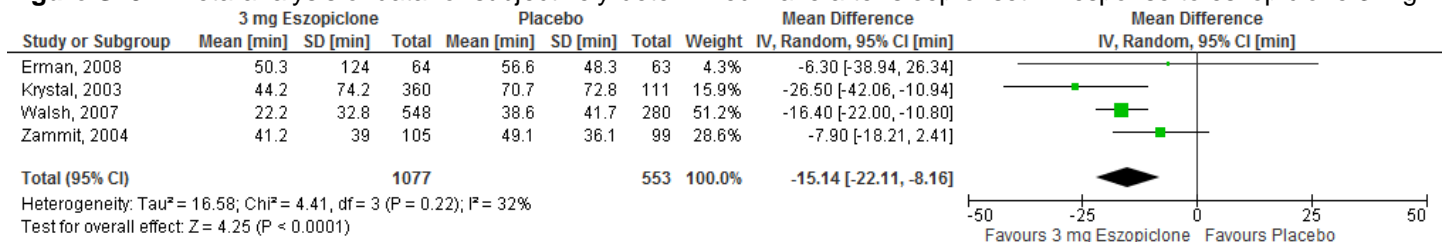

**Figure S20 – Meta-analysis of data for subjectively-determined quality of sleep in response to eszopiclone 3 mg**

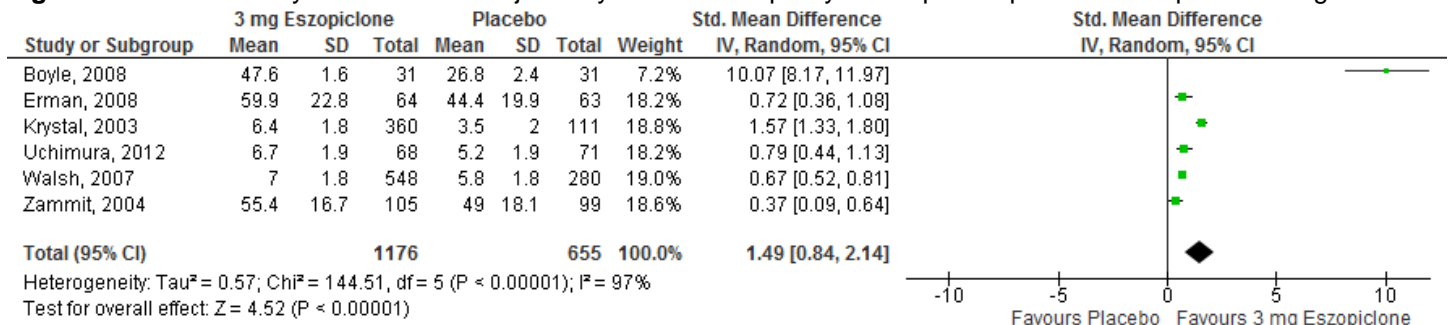

**Figure S21 – Meta-analysis of data for PSG-determined sleep efficiency in response to eszopiclone 3 mg**

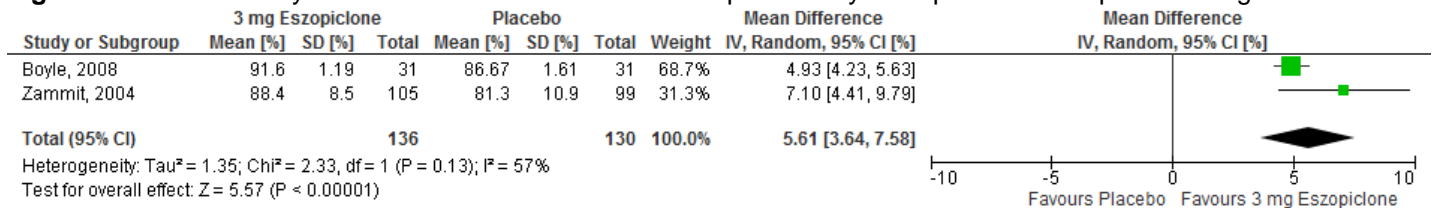

**Figure S22 – Meta-analysis of data for subjectively-determined number of awakenings in response to eszopiclone 3 mg**

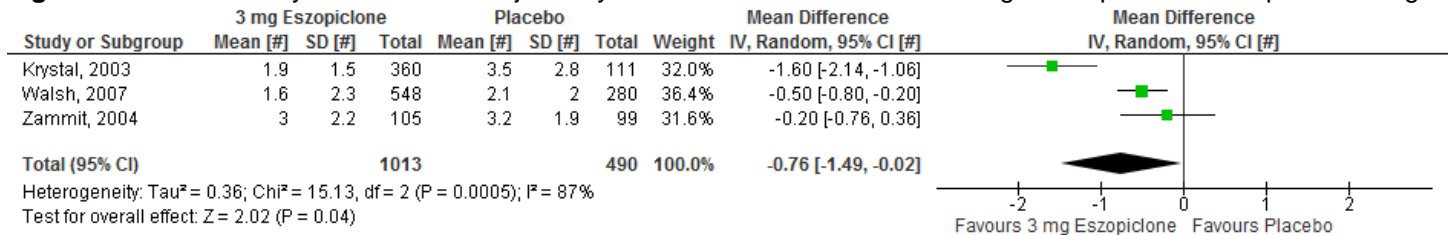

**Table S5 – Summary of Findings table for eszopiclone 3 mg for the treatment of chronic insomnia**

**References:** Boyle 2008(A); Erman 2008(B); Krystal 2003(C); Uchimura 2012(D); Walsh 2007(E); Zammit 2004(F)

| Outcomes                                      | Quality of the evidence (GRADE)          | Absolute Difference 3 mg Eszopiclone vs Placebo                                                                         | No of Participants (studies)               |
|-----------------------------------------------|------------------------------------------|-------------------------------------------------------------------------------------------------------------------------|--------------------------------------------|
| <b>Sleep Latency*</b><br>(PSG)                | ⊕⊕⊕⊖<br><b>very low</b> <sup>1,2,3</sup> | The mean sleep latency in the eszopiclone groups was <b>13.63 minutes lower</b><br>(23.56 to 3.7 lower)                 | 405<br>(3 studies) <sup>A,D,F</sup>        |
| <b>Sleep Latency</b><br>(Subjective)          | ⊕⊕⊕⊖<br><b>low</b> <sup>3,4</sup>        | The mean sleep latency in the eszopiclone groups was <b>25.00 minutes lower</b><br>(36.07 to 13.94 lower)               | 1630<br>(4 studies) <sup>B,C,E,F</sup>     |
| <b>Total Sleep Time*</b><br>(Subjective)      | ⊕⊕⊕⊖<br><b>moderate</b> <sup>3</sup>     | The mean total sleep time in the eszopiclone groups was <b>57.10 minutes higher</b><br>(37.45 to 76.75 higher)          | 1630<br>(4 studies) <sup>B,C,E,F</sup>     |
| <b>Wake After Sleep Onset*</b><br>(PSG)       | ⊕⊕⊕⊖<br><b>moderate</b> <sup>3</sup>     | The mean wake after sleep onset in the eszopiclone groups was <b>14.69 minutes lower</b><br>(17.68 to 11.69 lower)      | 266<br>(2 studies) <sup>A,F</sup>          |
| <b>Wake After Sleep Onset</b><br>(Subjective) | ⊕⊕⊕⊖<br><b>low</b> <sup>3,5</sup>        | The mean wake after sleep onset in the eszopiclone groups was <b>15.14 minutes lower</b><br>(22.11 to 8.16 lower)       | 1630<br>(4 studies) <sup>B,C,E,F</sup>     |
| <b>Quality of Sleep*</b><br>(Subjective)      | ⊕⊕⊕⊖<br><b>low</b> <sup>3,9</sup>        | The mean quality of sleep in the eszopiclone groups was <b>1.49 standard deviations higher</b><br>(0.84 to 2.14 higher) | 1769<br>(6 studies) <sup>A,B,C,D,E,F</sup> |
| <b>Sleep Efficiency</b><br>(PSG)              | ⊕⊕⊕⊖<br><b>low</b> <sup>3,6</sup>        | The mean sleep efficiency in the eszopiclone groups was <b>5.61 percent higher</b><br>(3.64 to 7.58 higher)             | 266<br>(2 studies) <sup>A,F</sup>          |
| <b>Number of Awakenings</b><br>(Subjective)   | ⊕⊕⊕⊖<br><b>very low</b> <sup>3,6,7</sup> | The mean number awakenings in the eszopiclone groups was <b>0.76 awakenings lower</b><br>(1.49 to 0.02 lower)           | 1503<br>(3 studies) <sup>C,E,F</sup>       |

\* Critical Outcome, used to determine Quality of Evidence

<sup>1</sup> Heterogeneity (I<sup>2</sup> = 88%) greater than allowance (75%)

<sup>2</sup> 95% CI (-23.56, -3.70) crosses Clinical Significance (10 min)

<sup>3</sup> All studies funded by industry

<sup>4</sup> 95% CI (-36.07, -13.94) crosses Clinical Significance (20 min)

<sup>5</sup> 95% CI (-22.11, -8.16) crosses Clinical Significance (20 min)

<sup>6</sup> Heterogeneity (I<sup>2</sup> = 87%) greater than allowance (75%)

<sup>7</sup> 95% CI (-1.49, -0.02) crosses Clinical Significance (0.5 awakenings)

<sup>8</sup> 95% CI (3.64, 7.58) crosses Clinical Significance

<sup>9</sup> Heterogeneity (I<sup>2</sup> = 93%) greater than allowance (75%)

## Zaleplon - Summary of Findings Tables

**Table S6** – Summary of Findings table for zaleplon 5 mg for the treatment of chronic insomnia

References: Hedner 2000(A)

| Outcomes                                 | Quality of the evidence (GRADE)      | Absolute Difference 5 mg Zaleplon vs Placebo                                                                            | No of Participants (studies)  |
|------------------------------------------|--------------------------------------|-------------------------------------------------------------------------------------------------------------------------|-------------------------------|
| <b>Quality of Sleep*</b><br>(Subjective) | ⊕⊕⊕⊖<br><b>moderate</b> <sup>1</sup> | The mean quality of sleep in the zaleplon group was <b>0.10 points<sup>2</sup> lower</b><br>(0.27 lower to 0.07 higher) | 277<br>(1 study) <sup>A</sup> |

\* Critical Outcome, used to determine Quality of Evidence

<sup>1</sup> Study funded by Industry

<sup>2</sup> 7-point scale (1=excellent, 7=extremely poor)

**Table S7** – Summary of Findings table for zaleplon 10 mg for the treatment of chronic insomnia

References: Hedner 2000(A); Walsh 2000(B)

| Outcomes                                 | Quality of the evidence (GRADE)      | Absolute Difference 10 mg Zaleplon vs Placebo                                                                           | No of Participants (studies)  |
|------------------------------------------|--------------------------------------|-------------------------------------------------------------------------------------------------------------------------|-------------------------------|
| <b>Sleep Latency*</b><br>(PSG)           | ⊕⊕⊖⊖<br><b>low</b> <sup>1,3</sup>    | The mean sleep latency in the zaleplon group was <b>9.50 minutes lower</b><br>(18.80 to 0.19 lower)                     | 94<br>(1 study) <sup>B</sup>  |
| <b>Sleep Latency</b><br>(Subjective)     | ⊕⊕⊖⊖<br><b>low</b> <sup>2,3</sup>    | The mean sleep latency in the zaleplon group was <b>11.40 minutes lower</b><br>(27.36 lower to 4.56 higher)             | 92<br>(1 study) <sup>B</sup>  |
| <b>Total Sleep Time*</b><br>(Subjective) | ⊕⊕⊖⊖<br><b>low</b> <sup>3,4</sup>    | The mean total sleep time in the zaleplon group was <b>21.50 minutes higher</b><br>(5.60 lower to 48.6 higher)          | 93<br>(1 study) <sup>B</sup>  |
| <b>Wake After Sleep Onset</b><br>(PSG)   | ⊕⊕⊕⊖<br><b>moderate</b> <sup>3</sup> | The mean wake after sleep onset in the zaleplon group was <b>2.10 minutes lower</b><br>(10.23 lower to 6.03 higher)     | 92<br>(1 study) <sup>B</sup>  |
| <b>Quality of Sleep*</b><br>(Subjective) | ⊕⊕⊕⊖<br><b>moderate</b> <sup>3</sup> | The mean quality of sleep in the zaleplon group was <b>0.10 points<sup>5</sup> lower</b><br>(0.27 lower to 0.07 higher) | 283<br>(1 study) <sup>A</sup> |

\* Critical Outcome, used to determine Quality of Evidence

<sup>1</sup> 95% CI (-18.8, -0.19) crosses Clinical Significance (10 min)

<sup>2</sup> 95% CI (-27.36, 4.56) crosses Clinical Significance (20 min)

<sup>3</sup> Study funded by Industry

<sup>4</sup> 95% CI (-5.60, 48.60) crosses Clinical Significance (30 min)

<sup>5</sup> 7-point scale (1=excellent, 7=extremely poor)

## Zolpidem - Meta-Analyses and Summary of Findings Tables

**Table S8** – Summary of Findings table for zolpidem 6.25 mg for the treatment of chronic insomnia

References: Walsh 2008

| Outcomes                                | Quality of the evidence (GRADE)      | Absolute Difference 6.25 mg Zolpidem vs Placebo                                                              | No of Participants (studies) |
|-----------------------------------------|--------------------------------------|--------------------------------------------------------------------------------------------------------------|------------------------------|
| <b>Sleep Latency*</b><br>(PSG)          | ⊕⊕⊖⊖<br><b>low</b> <sup>1,2</sup>    | The mean sleep latency in the zolpidem group was <b>5.27 minutes lower</b><br>(11.47 lower to 0.93 higher)   | 199<br>(1 study)             |
| <b>Wake After Sleep Onset*</b><br>(PSG) | ⊕⊕⊖⊖<br><b>low</b> <sup>1,3</sup>    | The mean wake after sleep onset in the zolpidem group was <b>13.03 minutes lower</b><br>(22.5 to 3.55 lower) | 199<br>(1 study)             |
| <b>Sleep Efficiency</b><br>(PSG)        | ⊕⊕⊕⊖<br><b>moderate</b> <sup>1</sup> | The mean sleep efficiency in the zolpidem group was <b>1.60 percent higher</b><br>(1.4 lower to 4.6 higher)  | 199<br>(1 study)             |

\* Critical Outcome, used to determine Quality of Evidence

<sup>1</sup> Funding source not specified, author disclosures not specified.

<sup>2</sup> 95% CI (-11.47, 0.93) crosses Clinical Significance

<sup>3</sup> 95% CI (-22.5, -3.55) crosses Clinical Significance (20 min)



**Figure S23 – Meta-analysis of data for PSG-determined sleep latency in response to zolpidem 10 mg**

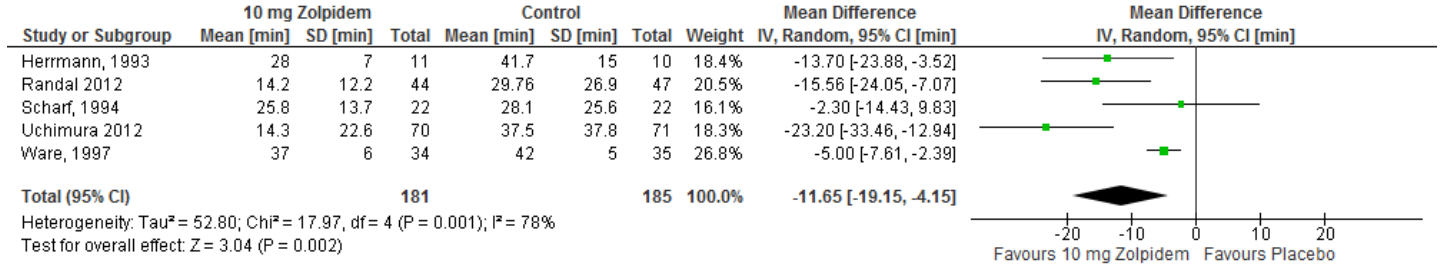

**Figure S24 – Meta-analysis of data for subjectively-determined sleep latency in response to zolpidem 10 mg**

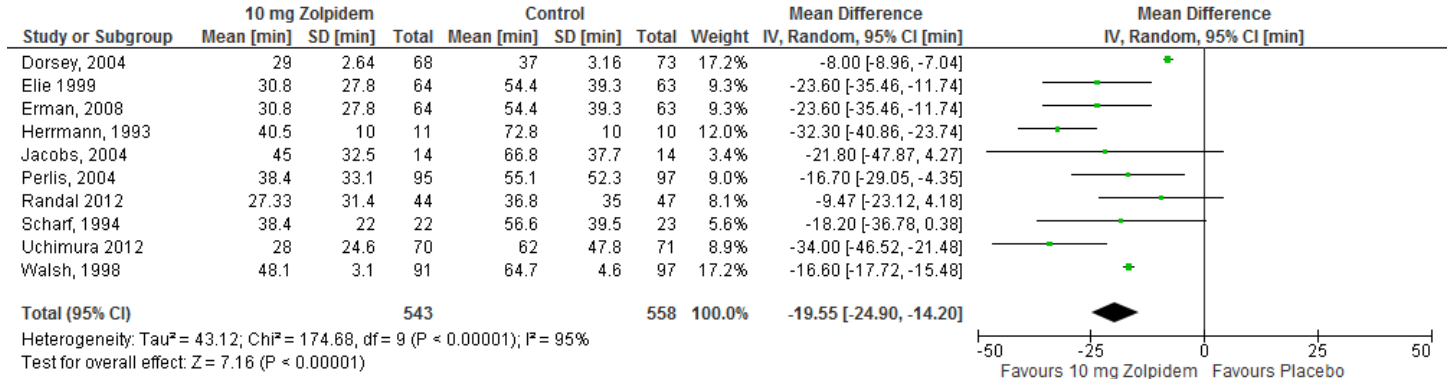

**Figure S25 – Meta-analysis of data for PSG-determined total sleep time in response to zolpidem 10 mg**

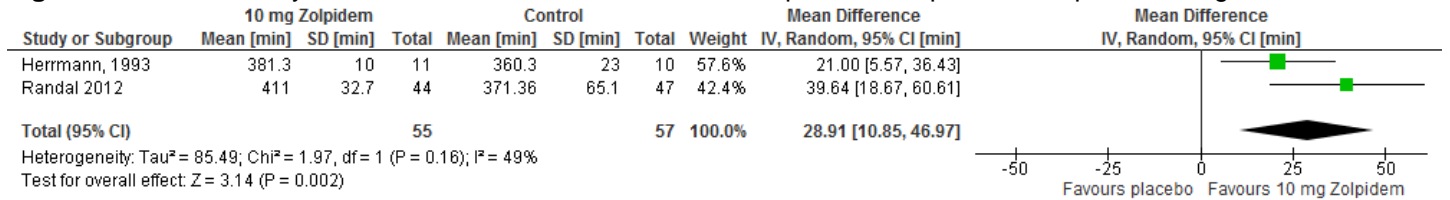

**Figure S26 – Meta-analysis of data for subjectively-determined total sleep time in response to zolpidem 10 mg**

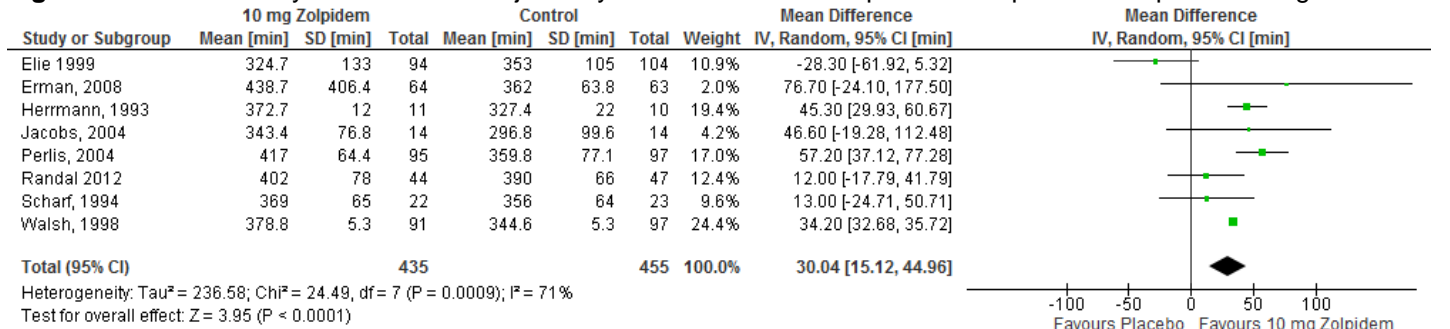

**Figure S27 – Meta-analysis of data for PSG-determined wake after sleep onset in response to zolpidem 10 mg**

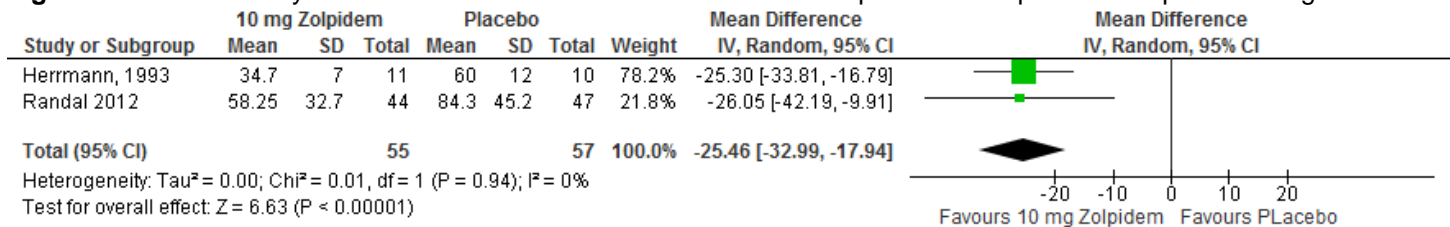

**Figure S28 – Meta-analysis of data for subjectively-determined wake after sleep onset in response to zolpidem 10 mg**

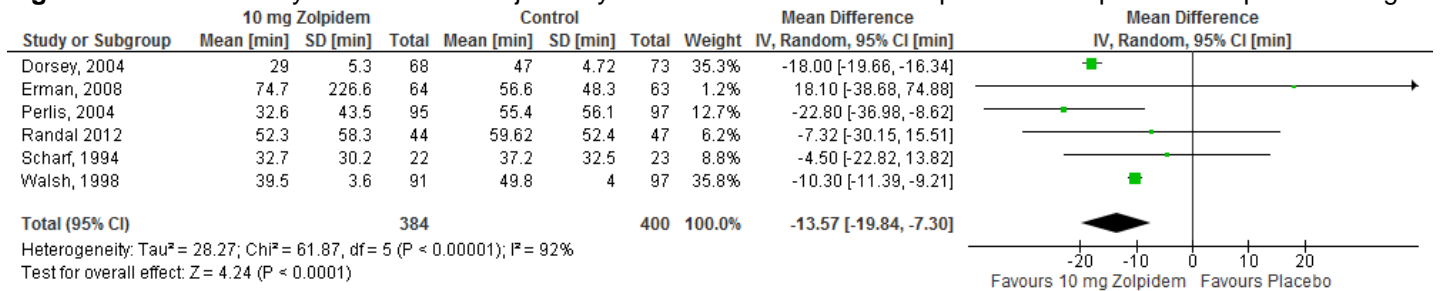

**Figure S29 – Meta-analysis of data for subjectively-determined quality of sleep in response to zolpidem 10 mg**

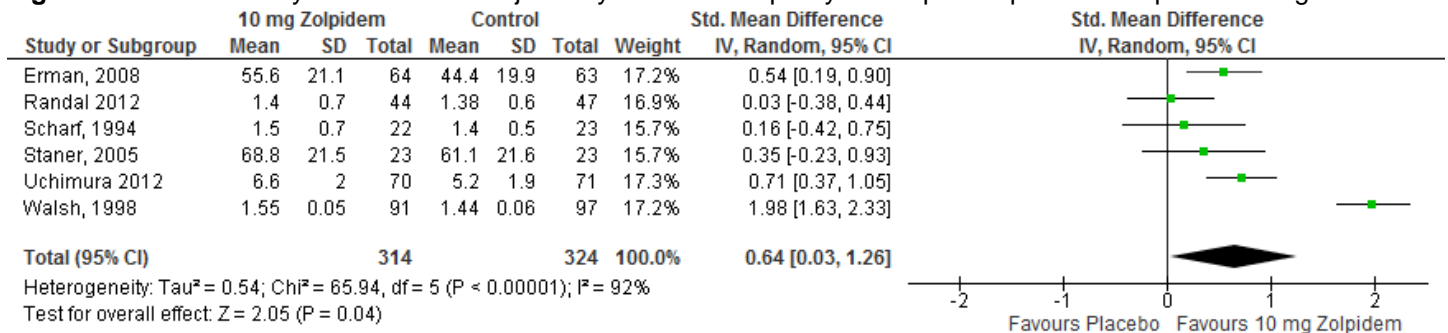

**Figure S30 – Meta-analysis of data for PSG-determined sleep efficiency in response to zolpidem 10 mg**

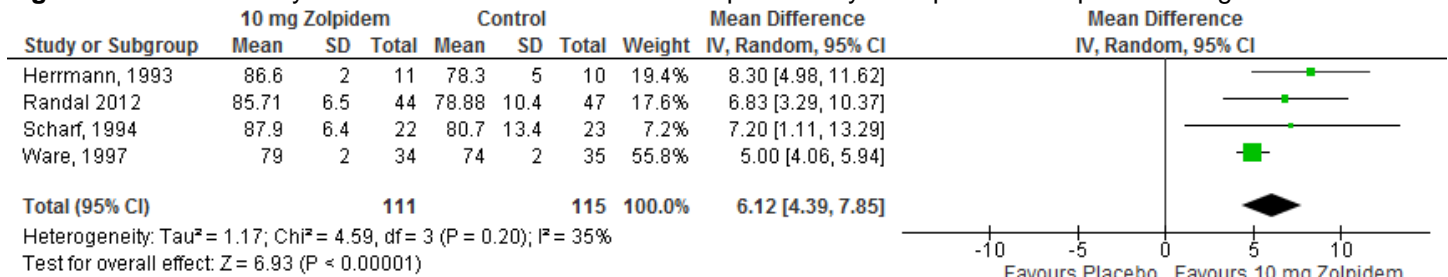

**Figure S31 – Meta-analysis of data for PSG-determined number of awakenings in response to zolpidem 10 mg**

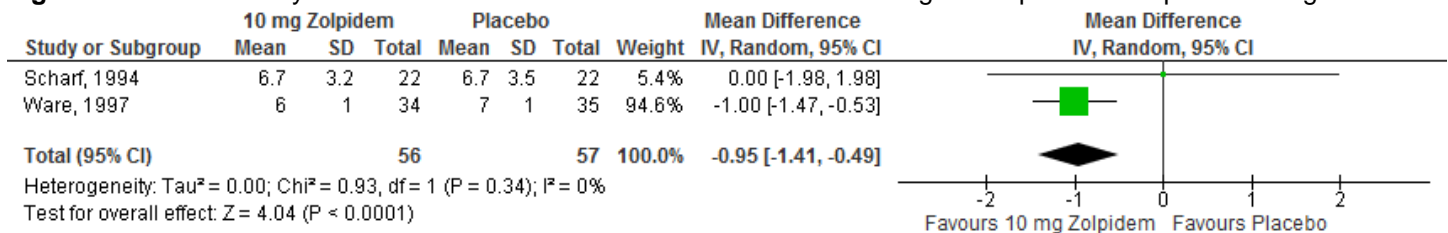

**Figure S32 – Meta-analysis of data for subjectively-determined number of awakenings in response to zolpidem 10 mg**

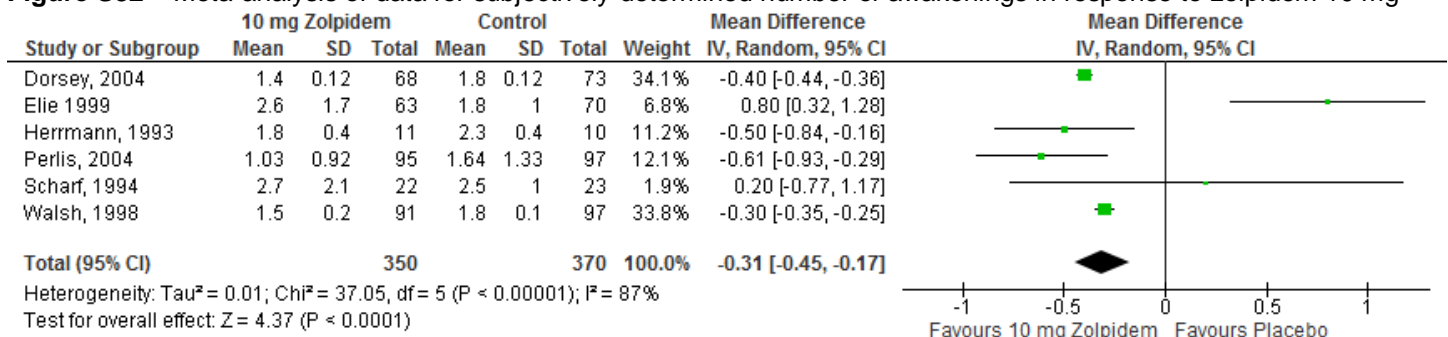

**Figure S33 – Meta-analysis of data for the occurrence of amnesia in response to zolpidem 10 mg**

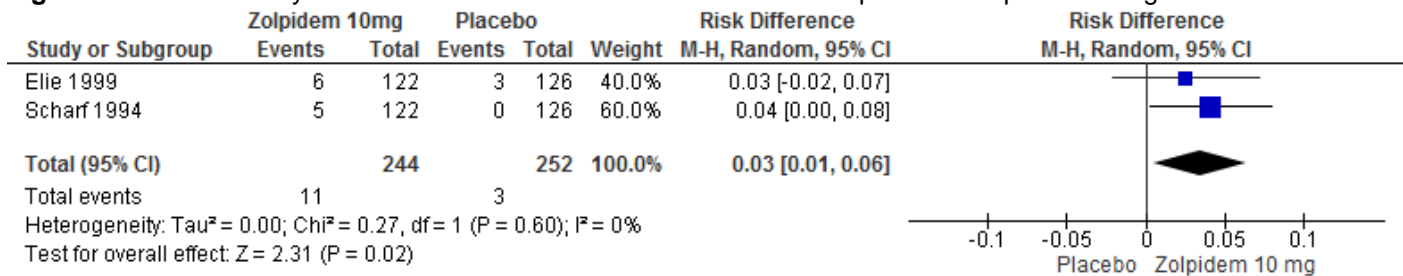

**Figure S34 – Meta-analysis of data for the occurrence of dizziness in response to zolpidem 10 mg**

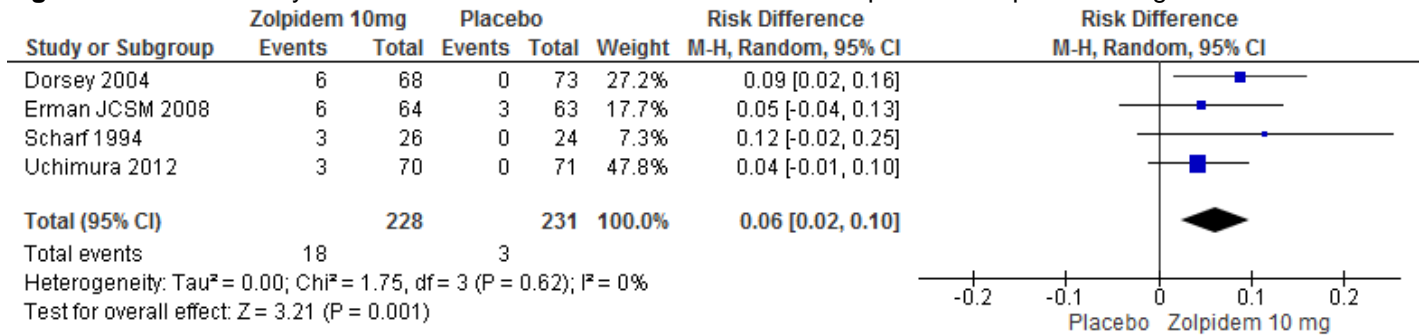

**Figure S35 – Meta-analysis of data for the occurrence of headache in response to zolpidem 10 mg**

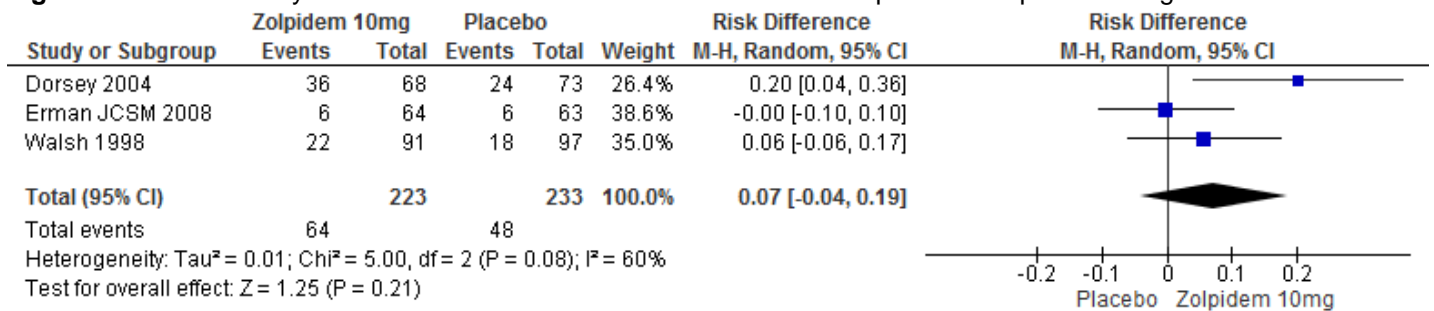

**Figure S36 – Meta-analysis of data for the occurrence of nausea in response to zolpidem 10 mg**

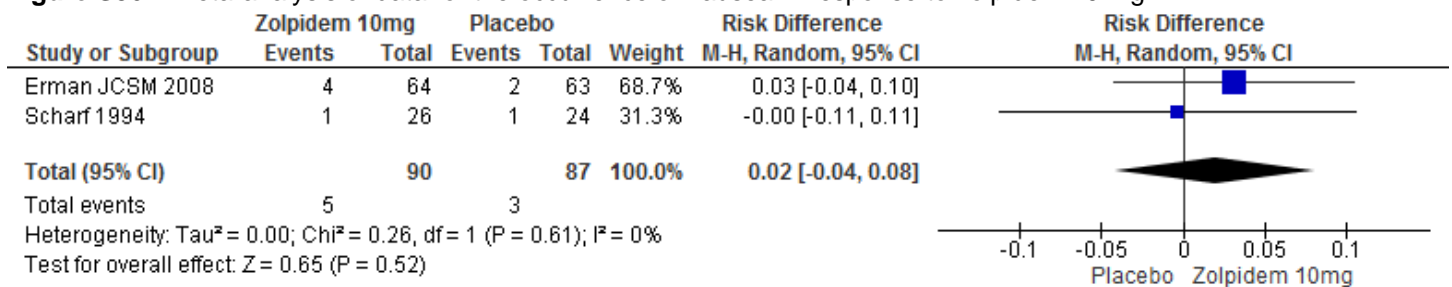

**Figure S37 – Meta-analysis of data for the occurrence of somnolence in response to zolpidem 10 mg**

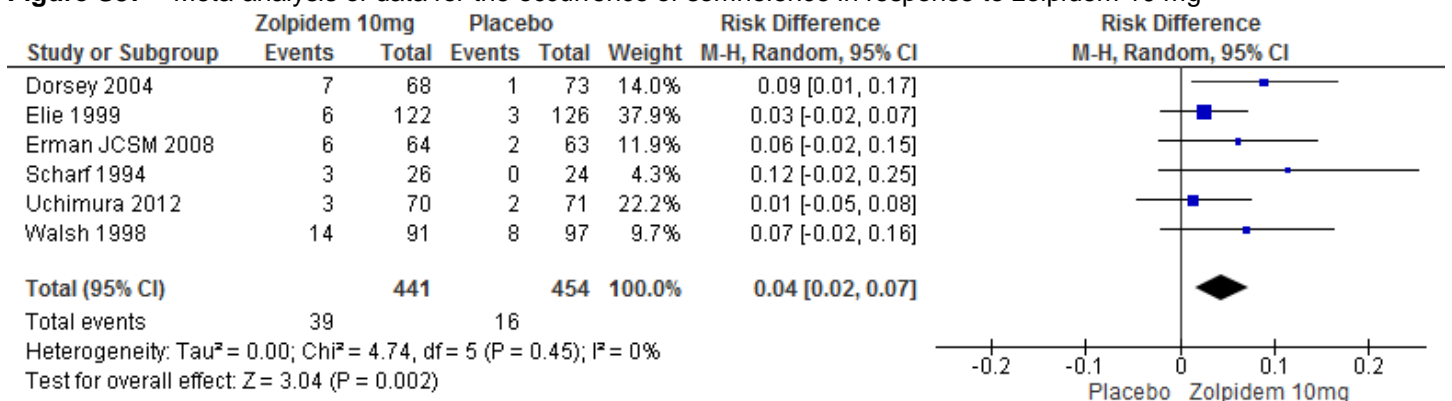

**Figure S38** – Meta-analysis of data for the occurrence of taste perversion in response to zolpidem 10 mg

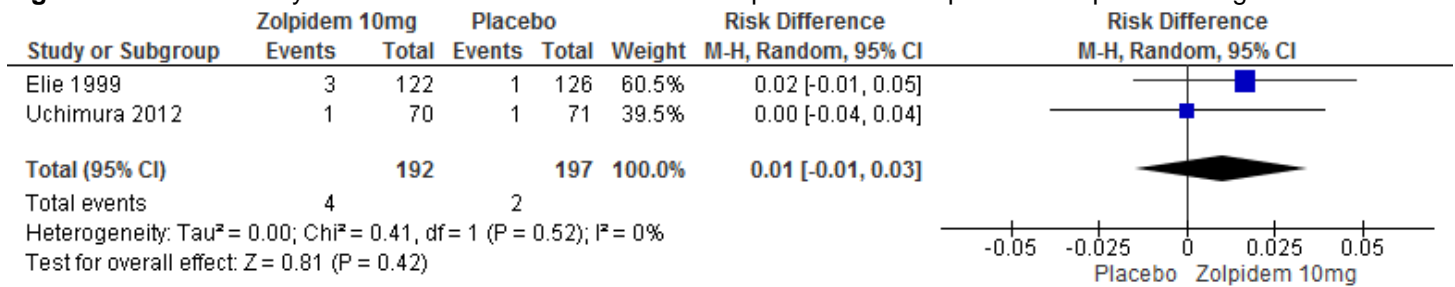

**Table S9** – Summary of Findings table for zolpidem 10 mg for the treatment of chronic insomnia

**References:** Dorsey 2004(A); Elie 1999(B); Erman 2008(C); Herrmann 1993(D); Jacobs 2004(E); Perlis 2004(F); Randal 2012(G); Scharf 1994(H); Staner 2005(I); Uchimura 2012(J); Walsh 1998(K); Ware 1997(L)

| Outcomes                                      | Quality of the evidence (GRADE)     | Absolute Difference 10 mg Zolpidem vs Placebo                                                                        | No of Participants (studies)                       |
|-----------------------------------------------|-------------------------------------|----------------------------------------------------------------------------------------------------------------------|----------------------------------------------------|
| <b>Sleep Latency*</b><br>(PSG)                | ⊕⊕⊕⊕<br>very low <sup>1,2,3</sup>   | The mean sleep latency in the zolpidem groups was <b>11.65 minutes lower</b><br>(19.15 to 4.15 lower)                | 366<br>(5 studies) <sup>D,G,H,J,L</sup>            |
| <b>Sleep Latency</b><br>(Subjective)          | ⊕⊕⊕⊕<br>very low <sup>3,4,5</sup>   | The mean sleep latency in the zolpidem groups was <b>19.55 minutes lower</b><br>(24.90 to 14.20 lower)               | 1101<br>(10 studies) <sup>A,B,C,D,E,FG,H,J,K</sup> |
| <b>Total Sleep Time*</b><br>(PSG)             | ⊕⊕⊕⊕<br>low <sup>3,12</sup>         | The mean total sleep time in the zolpidem groups was <b>28.91 minutes higher</b><br>(10.85 to 46.97 higher)          | 112<br>(2 studies) <sup>D,G</sup>                  |
| <b>Total Sleep Time*</b><br>(Subjective)      | ⊕⊕⊕⊕<br>low <sup>3,7</sup>          | The mean total sleep time in the zolpidem groups was <b>30.04 minutes higher</b><br>(15.12 to 44.96 higher)          | 890<br>(8 studies) <sup>B,C,D,E,F,G,H,K</sup>      |
| <b>Wake After Sleep Onset*</b><br>(PSG)       | ⊕⊕⊕⊕<br>low <sup>3,13</sup>         | The mean wake after sleep onset in the zolpidem groups was <b>25.46 minutes lower</b><br>(32.99 to 17.94 lower)      | 112<br>(2 studies) <sup>D,G</sup>                  |
| <b>Wake After Sleep Onset</b><br>(Subjective) | ⊕⊕⊕⊕<br>low <sup>3,6</sup>          | The mean wake after sleep onset in the zolpidem groups was <b>13.57 minutes lower</b><br>(19.84 to 7.30 lower)       | 784<br>(6 studies) <sup>A,C,F,G,H,K</sup>          |
| <b>Quality of Sleep*</b><br>(Subjective)      | ⊕⊕⊕⊕<br>very low <sup>3,10,11</sup> | The mean quality of sleep in the zolpidem groups was <b>0.64 standard deviations higher</b><br>(0.03 to 1.26 higher) | 638<br>(6 studies) <sup>C,G,H,I,J,K</sup>          |
| <b>Sleep Efficiency</b><br>(PSG)              | ⊕⊕⊕⊕<br>low <sup>3,9</sup>          | The mean sleep efficiency in the zolpidem groups was <b>6.12 percent higher</b><br>(4.39 to 7.85 higher)             | 226<br>(4 studies) <sup>D,G,H,L</sup>              |
| <b>Number of Awakenings</b><br>(PSG)          | ⊕⊕⊕⊕<br>moderate <sup>3</sup>       | The mean number of awakenings in the zolpidem groups was <b>0.95 awakenings lower</b><br>(1.41 to 0.49 lower)        | 113<br>(2 studies) <sup>H,L</sup>                  |
| <b>Number of Awakenings</b><br>(Subjective)   | ⊕⊕⊕⊕<br>low <sup>3,8</sup>          | The mean number of awakenings in the zolpidem groups was <b>0.31 awakenings lower</b><br>(0.45 to 0.17 lower)        | 720<br>(6 studies) <sup>A,B,D,F,H,K</sup>          |

\* Critical Outcome, used to determine Quality of Evidence  
<sup>1</sup> Heterogeneity (I<sup>2</sup> = 78%) greater than allowance (75%)  
<sup>2</sup> 95% CI (-19.15, -4.15) crosses Clinical Significance (10 min)  
<sup>3</sup> Studies funded by industry  
<sup>4</sup> Heterogeneity (I<sup>2</sup> = 95%) greater than allowance (75%)  
<sup>5</sup> 95% CI (-24.90, -14.20) crosses Clinical Significance (20 min)  
<sup>6</sup> Heterogeneity (I<sup>2</sup> = 92%) greater than allowance (75%)  
<sup>7</sup> 95% CI (15.12, 44.96) crosses Clinical Significance (30 min)  
<sup>8</sup> Heterogeneity (I<sup>2</sup> = 87%) greater than allowance (75%)  
<sup>9</sup> 95% CI (4.39, 7.85) crosses Clinical Significance (5%)  
<sup>10</sup> Heterogeneity (I<sup>2</sup> = 92%) greater than allowance (75%)  
<sup>11</sup> 95% CI (0.3, 1.26) crosses Clinical Significance (SMD 0.5)  
<sup>12</sup> 95% CI (10.85, 46.97) crosses Clinical Significance (20 min)  
<sup>13</sup> 95% CI (-32.99, -17.4) crosses Clinical Significance (20 min)

**Table S10 – Summary of Findings table for zolpidem 12.5 mg for the treatment of chronic insomnia**

References: Roth 2006

| Outcomes                             | Quality of the evidence (GRADE)      | Absolute Difference 12.5 Zolpidem vs Placebo                                                                | No of Participants (studies) |
|--------------------------------------|--------------------------------------|-------------------------------------------------------------------------------------------------------------|------------------------------|
| <b>Sleep Latency*</b> (PSG)          | ⊕⊕⊖⊖<br><b>low</b> <sup>1,2</sup>    | The mean sleep latency in the zolpidem group was <b>8.19 minutes lower</b> (15.22 to 1.15 lower)            | 212 (1 study)                |
| <b>Wake After Sleep Onset*</b> (PSG) | ⊕⊕⊖⊖<br><b>low</b> <sup>1,3</sup>    | The mean wake after sleep onset in the zolpidem group was <b>19.99 minutes lower</b> (27.33 to 12.64 lower) | 212 (1 study)                |
| <b>Sleep Efficiency</b> (PSG)        | ⊕⊕⊕⊕<br><b>moderate</b> <sup>1</sup> | The mean sleep efficiency in the zolpidem group was <b>3.9 percent higher</b> (1.38 to 6.41 higher)         | 212 (1 study)                |

\* Critical Outcome, used to determine Quality of Evidence

<sup>1</sup> Funding source not specified, author disclosures not specified.

<sup>2</sup> 95% CI (-15.22, 1.15) crosses Clinical Significance (10 min)

<sup>3</sup> 95% CI (-27.33, -12.64) crosses Clinical Significance (20 min)

### Triazolam - Summary of Findings Table

**Table S11 – Summary of Findings table for triazolam 0.25 mg for the treatment of chronic insomnia**

References: Roehrs 2001

| Outcomes                                 | Quality of the evidence (GRADE)      | Absolute Difference 0.25 mg Triazolam vs Placebo                                                                 | No of Participants (studies) |
|------------------------------------------|--------------------------------------|------------------------------------------------------------------------------------------------------------------|------------------------------|
| <b>Sleep Latency*</b> (Subjective)       | ⊕⊕⊕⊕<br><b>high</b>                  | The mean sleep latency in the triazolam group was <b>9.20 minutes lower</b> (22.3 lower to 3.9 higher)           | 64 (1 study)                 |
| <b>Total Sleep Time</b> (Subjective)     | ⊕⊕⊕⊖<br><b>moderate</b> <sup>1</sup> | The mean total sleep time in the triazolam group was <b>25.20 minutes higher</b> (9.12 lower to 59.52 higher)    | 64 (1 study)                 |
| <b>Quality of Sleep*</b> (Subjective)    | ⊕⊕⊕⊕<br><b>high</b>                  | The mean quality of sleep in the triazolam group was <b>0.37 points<sup>3</sup> lower</b> (0.66 to 0.07 lower)   | 64 (1 study)                 |
| <b>Number of Awakenings</b> (Subjective) | ⊕⊕⊖⊖<br><b>low</b> <sup>2</sup>      | The mean number of awakenings in the triazolam group was <b>0.37 awakenings lower</b> (1.7 lower to 0.96 higher) | 64 (1 study)                 |

\* Critical Outcome, used to determine Quality of Evidence

<sup>1</sup> 95% CI (-9.12, 59.52) crosses Clinical Significance (30 min)

<sup>2</sup> 95% CI (-1.7, 0.96) crosses Clinical Significance (0.5 awakenings)

<sup>3</sup> 4-point scale (1=good, 4=poor)

### Temazepam - Meta-Analyses and Summary of Findings Tables

**Figure S39 – Meta-analysis of data for subjectively-determined sleep latency in response to temazepam 15 mg**

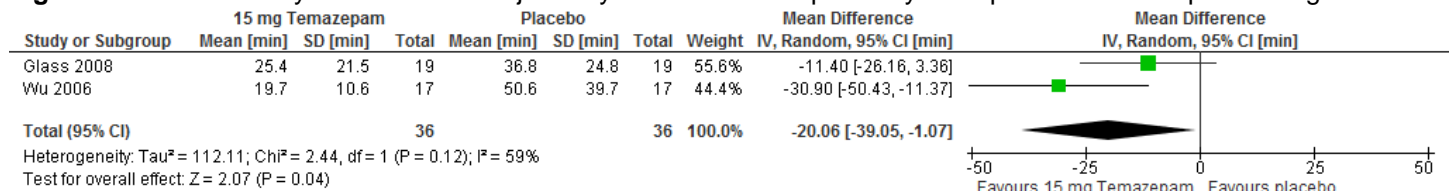

**Figure S40 – Meta-analysis of data for subjectively-determined total sleep time in response to temazepam 15 mg**

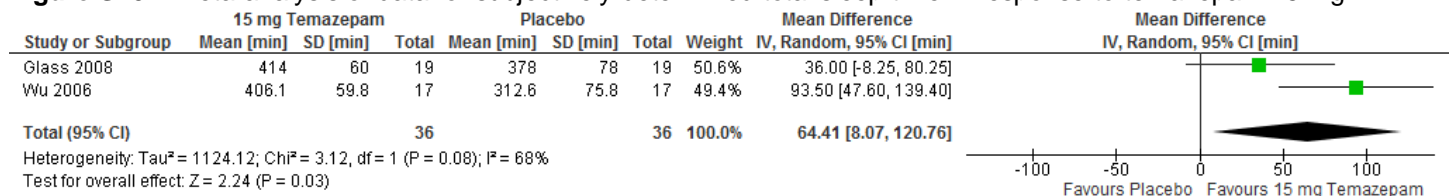

**Figure S41 – Meta-analysis of data for subjectively-determined quality of sleep in response to temazepam 15 mg**

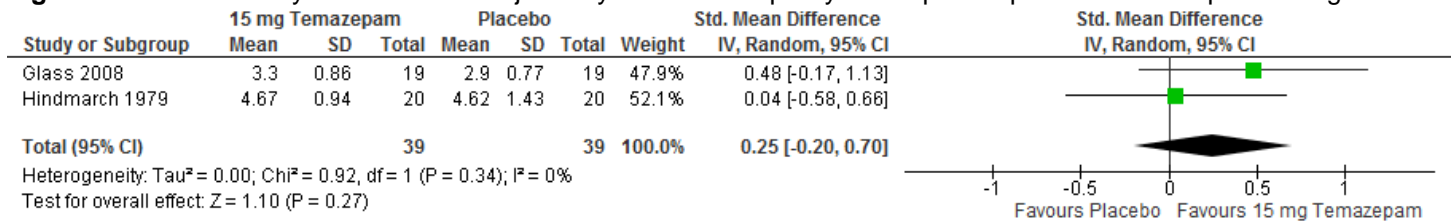

**Table S12 – Summary of Findings table for temazepam 15 mg for the treatment of chronic insomnia**

Reference: Glass 2008(A); Hindmarch 1979(B); Wu 2006 (C)

| Outcomes                                    | Quality of the evidence (GRADE)      | Absolute Difference<br>15 mg Temazepam vs Placebo                                                                        | No of Participants (studies)     |
|---------------------------------------------|--------------------------------------|--------------------------------------------------------------------------------------------------------------------------|----------------------------------|
| <b>Sleep Latency*</b><br>(PSG)              | ⊕⊕⊕⊕<br><b>high</b>                  | The mean sleep latency in the temazepam group was <b>37.1 minutes lower</b><br>(52.8 to 21.31 lower)                     | 34<br>(1 study) <sup>C</sup>     |
| <b>Sleep Latency</b><br>(Subjective)        | ⊕⊕⊕⊖<br><b>moderate</b> <sup>2</sup> | The mean sleep latency in the temazepam group was <b>20.06 minutes lower</b><br>(39.05 to 1.07 lower)                    | 72<br>(2 studies) <sup>A,C</sup> |
| <b>Total Sleep Time*</b><br>(PSG)           | ⊕⊕⊕⊕<br><b>high</b>                  | The mean total sleep time in the temazepam group was <b>99.1 minutes higher</b><br>(63.4 to 134.7 lower)                 | 34<br>(1 study) <sup>C</sup>     |
| <b>Total Sleep Time</b><br>(Subjective)     | ⊕⊕⊕⊖<br><b>moderate</b> <sup>3</sup> | The mean total sleep time in the temazepam groups was <b>64.41 minutes higher</b><br>(8.07 to 120.76 higher)             | 72<br>(2 studies) <sup>A,C</sup> |
| <b>Quality of Sleep*</b><br>(Subjective)    | ⊕⊕⊕⊖<br><b>moderate</b> <sup>1</sup> | The mean quality of sleep in the temazepam group was <b>0.25 standard deviations higher</b><br>(0.2 lower to 0.7 higher) | 39<br>(2 studies) <sup>A,B</sup> |
| <b>Sleep Efficiency</b><br>(PSG)            | ⊕⊕⊕⊖<br><b>moderate</b> <sup>5</sup> | The mean sleep efficiency in the temazepam group was <b>13.3 percent higher</b><br>(3.9 to 22.6 higher)                  | 34<br>(1 study) <sup>C</sup>     |
| <b>Sleep Efficiency</b><br>(Subjective)     | ⊕⊕⊕⊖<br><b>moderate</b> <sup>6</sup> | The mean sleep efficiency in the temazepam group was <b>14.1 percent higher</b><br>(5.8 to 22.3 higher)                  | 34<br>(1 study) <sup>C</sup>     |
| <b>Number of Awakenings</b><br>(Subjective) | ⊕⊕⊕⊖<br><b>moderate</b> <sup>4</sup> | The mean number of awakenings in the temazepam group was <b>0.5 awakenings lower</b><br>(1.29 lower to 0.29 higher)      | 38<br>(1 study) <sup>A</sup>     |

\* Critical Outcome, used to determine Quality of Evidence

<sup>1</sup> 95% CI (-0.2, 0.7) crosses Clinical Significance (0.5 SMD)

<sup>2</sup> 95% CI (-39.05, -1.07) crosses Clinical Significance (20 min)

<sup>3</sup> 95% CI (8.07, 120.76) crosses Clinical Significance (30 min)

<sup>4</sup> 95% CI (-1.29, 0.29) crosses Clinical Significance (0.5 awakenings)

<sup>5</sup> 95% CI (3.9, 22.6) crosses Clinical Significance (5%)

<sup>6</sup> 95% CI (5.8, 22.3) crosses Clinical Significance (10%)

**Table S13 – Summary of Findings table for temazepam 30 mg for the treatment of chronic insomnia**

References: Hindmarch 1979

| Outcomes                                 | Quality of the evidence (GRADE)      | Absolute Difference<br>30 mg Temazepam vs Placebo                                                                     | No of Participants (studies) |
|------------------------------------------|--------------------------------------|-----------------------------------------------------------------------------------------------------------------------|------------------------------|
| <b>Quality of Sleep*</b><br>(Subjective) | ⊕⊕⊕⊖<br><b>moderate</b> <sup>1</sup> | The mean quality of sleep in the temazepam group was <b>0.69 cm<sup>2</sup> higher</b><br>(0.28 lower to 1.66 higher) | 40<br>(1 study)              |

\* Critical Outcome, used to determine Quality of Evidence

<sup>1</sup> 95% CI (-0.28, 1.66) crosses Clinical Significance (1.0 cm)

<sup>2</sup> 10 cm line analogue rating scale

## Ramelteon - Meta-Analyses and Summary of Findings Table

**Figure S42** – Meta-analysis of data for PSG-determined sleep latency in response to ramelteon 8 mg

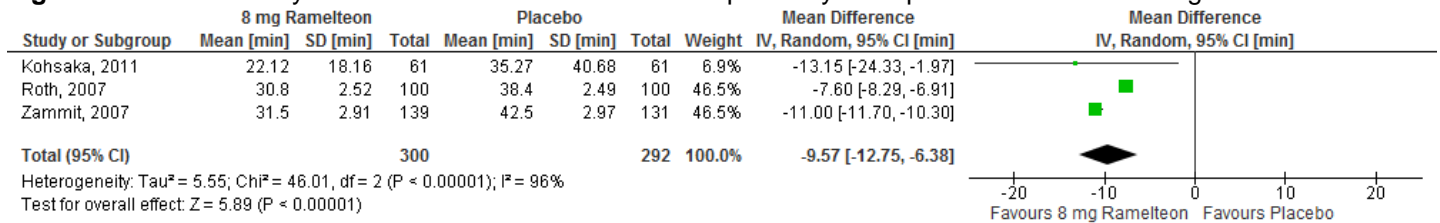

**Figure S43** – Meta-analysis of data for subjectively-determined sleep latency in response to ramelteon 8 mg

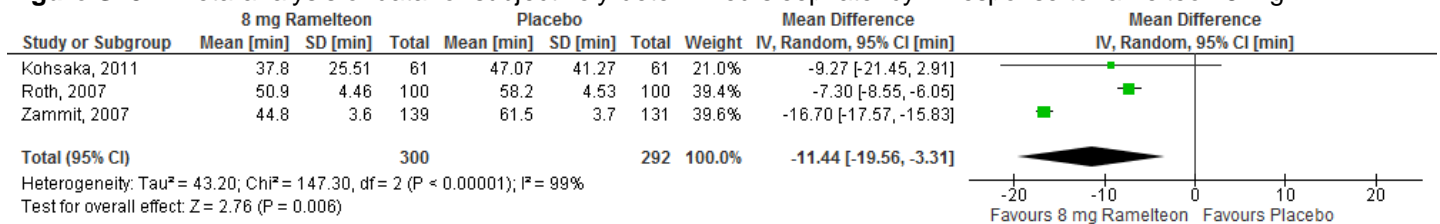

**Figure S44** – Meta-analysis of data for PSG-determined total sleep time in response to ramelteon 8 mg

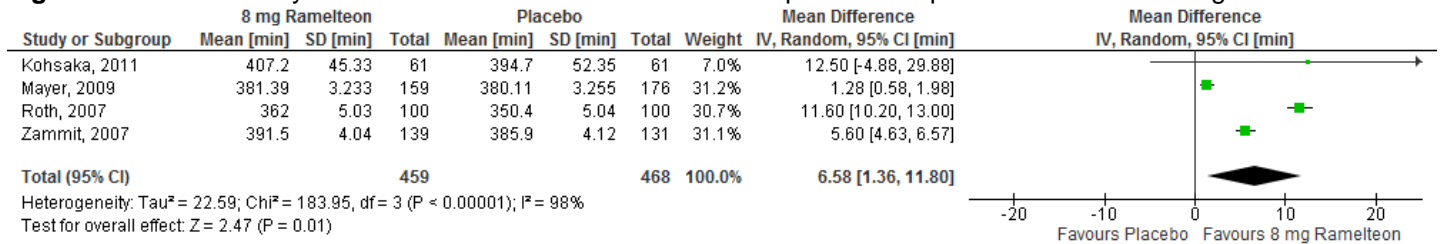

**Figure S45** – Meta-analysis of data for subjectively-determined total sleep time in response to ramelteon 8 mg

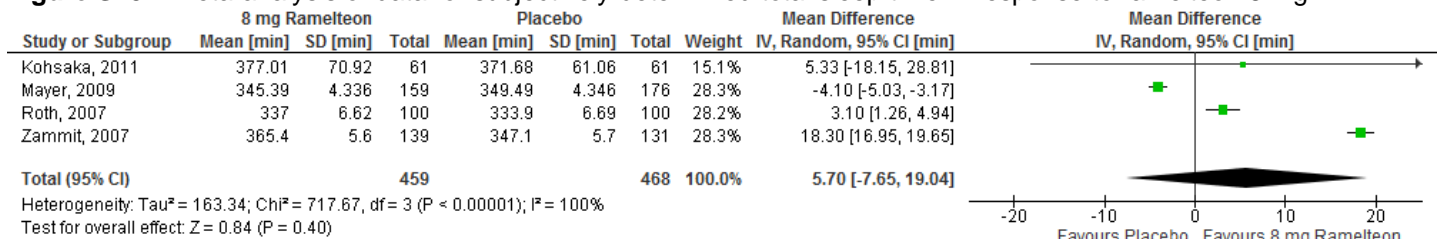

**Figure S46** – Meta-analysis of data for PSG-determined wake after sleep onset in response to ramelteon 8 mg

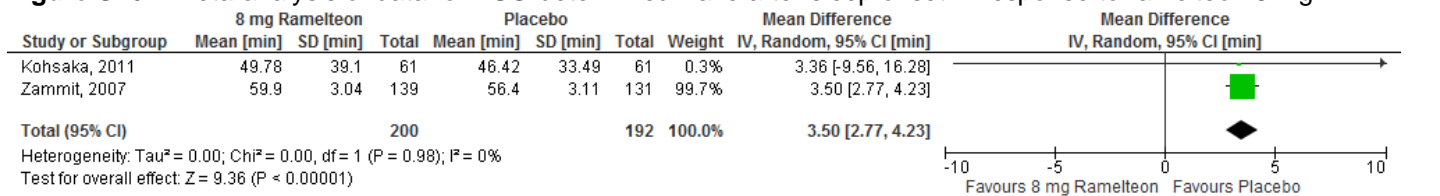

**Figure S47** – Meta-analysis of data for subjectively-determined wake after sleep onset in response to ramelteon 8 mg

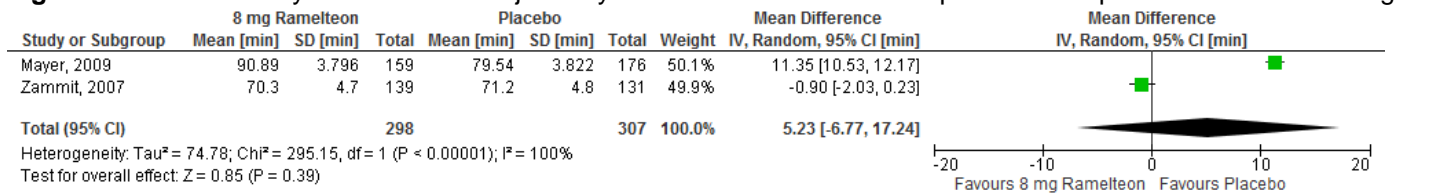

**Figure S48 – Meta-analysis of data for PSG-determined quality of sleep in response to ramelteon 8 mg**

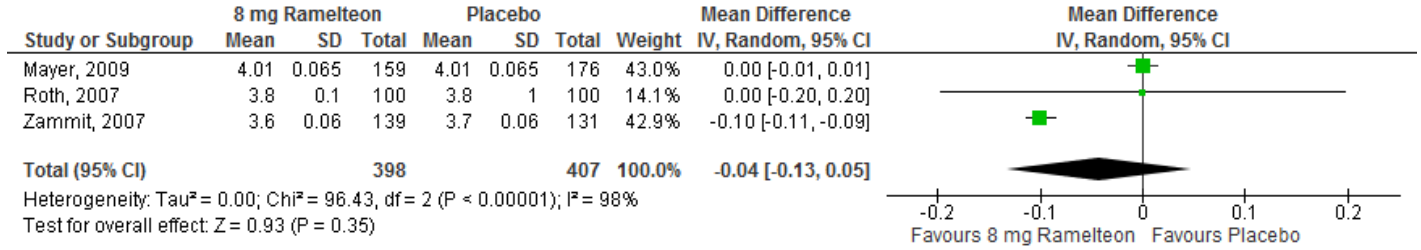

**Figure S49 – Meta-analysis of data for PSG-determined sleep efficiency in response to ramelteon 8 mg**

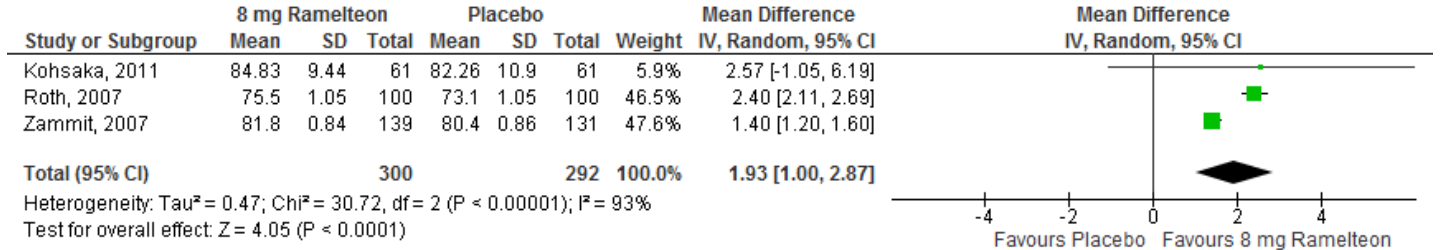

**Figure S50 – Meta-analysis of data for the occurrence of headache in response to ramelteon 8 mg**

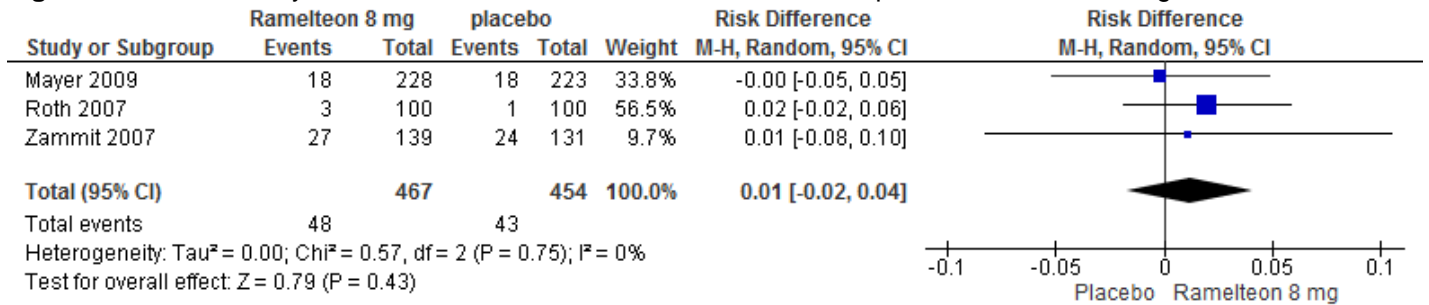

**Figure S51 – Meta-analysis of data for the occurrence of upper respiratory tract infection in response to ramelteon 8 mg**

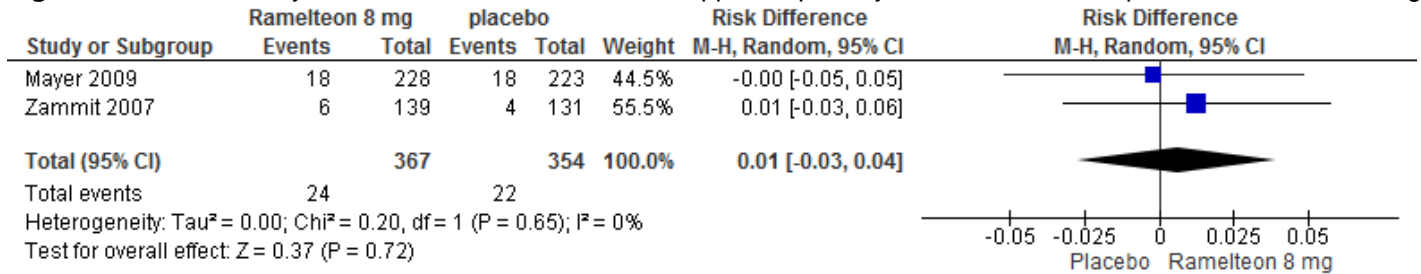



**Table S14 – Summary of Findings table for ramelteon 8 mg for the treatment of chronic insomnia**

References: Kohsaka 2011 (A); Mayer 2009(B); Roth 2007(C); Zammit 2007(D)

| Outcomes                                   | Quality of the evidence (GRADE)          | Absolute Difference 8 mg Ramelteon vs Placebo                                                                           | No of Participants (studies)       |
|--------------------------------------------|------------------------------------------|-------------------------------------------------------------------------------------------------------------------------|------------------------------------|
| <b>Sleep Latency*</b> (PSG)                | ⊕⊖⊖⊖<br><b>very low</b> <sup>1,2,3</sup> | The mean sleep latency in the ramelteon groups was <b>9.57 minutes lower</b> (12.75 to 6.38 lower)                      | 592 (3 studies) <sup>A,C,D</sup>   |
| <b>Sleep Latency</b> (Subjective)          | ⊕⊕⊖⊖<br><b>low</b> <sup>3,7,8</sup>      | The mean sleep latency in the ramelteon groups was <b>11.44 minutes lower</b> (19.56 to 3.31 lower)                     | 592 (3 studies) <sup>A,C,D</sup>   |
| <b>Total Sleep Time</b> (PSG)              | ⊕⊕⊖⊖<br><b>low</b> <sup>1,3</sup>        | The mean total sleep time in the ramelteon groups was <b>6.58 minutes higher</b> (1.36 to 11.80 higher)                 | 927 (4 studies) <sup>A,B,C,D</sup> |
| <b>Total Sleep Time</b> (Subjective)       | ⊕⊕⊖⊖<br><b>low</b> <sup>3,6</sup>        | The mean total sleep time in the ramelteon groups was <b>5.70 minutes higher</b> (7.65 lower to 19.04 higher)           | 927 (4 studies) <sup>A,B,C,D</sup> |
| <b>Wake After Sleep Onset</b> (PSG)        | ⊕⊕⊕⊖<br><b>moderate</b> <sup>3</sup>     | The mean wake after sleep onset in the ramelteon groups was <b>3.50 minutes higher</b> (2.77 to 4.23 higher)            | 392 (2 study) <sup>A,D</sup>       |
| <b>Wake After Sleep Onset</b> (Subjective) | ⊕⊕⊖⊖<br><b>low</b> <sup>3,6</sup>        | The mean wake after sleep onset in the ramelteon groups was <b>5.23 minutes higher</b> (6.77 lower to 17.24 higher)     | 605 (2 studies) <sup>B,D</sup>     |
| <b>Quality of Sleep*</b> (Subjective)      | ⊕⊕⊖⊖<br><b>low</b> <sup>1,3</sup>        | The mean quality of sleep in the ramelteon groups was <b>0.04 points lower</b> <sup>5</sup> (0.13 lower to 0.05 higher) | 805 (3 studies) <sup>B,C,D</sup>   |
| <b>Sleep Efficiency</b> (PSG)              | ⊕⊕⊖⊖<br><b>low</b> <sup>3,4</sup>        | The mean sleep efficiency in the ramelteon groups was <b>1.93 percent higher</b> (1.00 to 2.87 higher)                  | 592 (3 studies) <sup>A,C,D</sup>   |
| <b>Number of Awakenings</b> (Subjective)   | ⊕⊕⊕⊖<br><b>moderate</b> <sup>3</sup>     | The mean number of awakenings in the ramelteon group was <b>0.12 awakenings higher</b> (0.08 to 0.15 higher)            | 335 (1 study) <sup>B</sup>         |

\* Critical Outcome, used to determine Quality of Evidence

<sup>1</sup> Heterogeneity (I<sup>2</sup> = 98%) is greater than allowance (75%)

<sup>2</sup> 95% CI (-12.75, -6.38) crosses Clinical Significance (10 min)

<sup>3</sup> All studies funded by industry

<sup>4</sup> Heterogeneity (I<sup>2</sup> = 93%) greater than allowance (75%)

<sup>5</sup> 7-point Likert scale (1=excellent, 7=very poor)

<sup>6</sup> Heterogeneity (I<sup>2</sup> =100%) greater than allowance (75%)

<sup>7</sup> Heterogeneity (I<sup>2</sup> =99%) greater than allowance (75%)

<sup>8</sup> 95% CI (-21.45, 2.90) crosses Clinical Significance (20 min)

## Doxepin - Meta-Analyses and Summary of Findings Tables

**Figure S4952 – Meta-analysis of data for PSG-determined sleep latency in response to doxepin 3 mg**

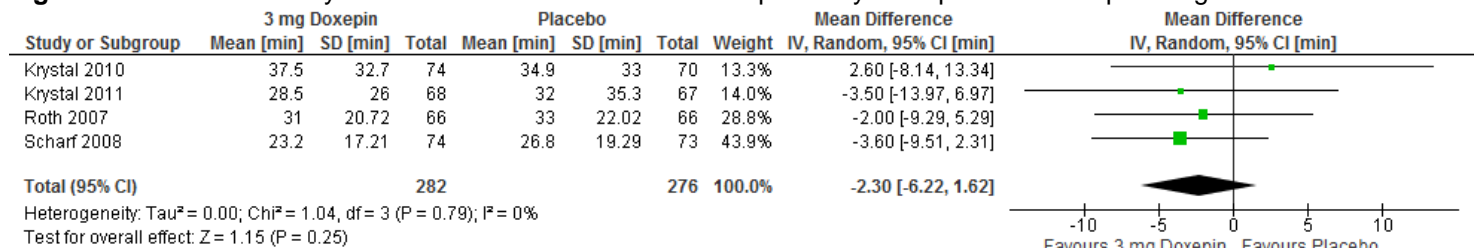

**Figure S53 – Meta-analysis of data for subjectively-determined sleep latency in response to doxepin 3 mg**

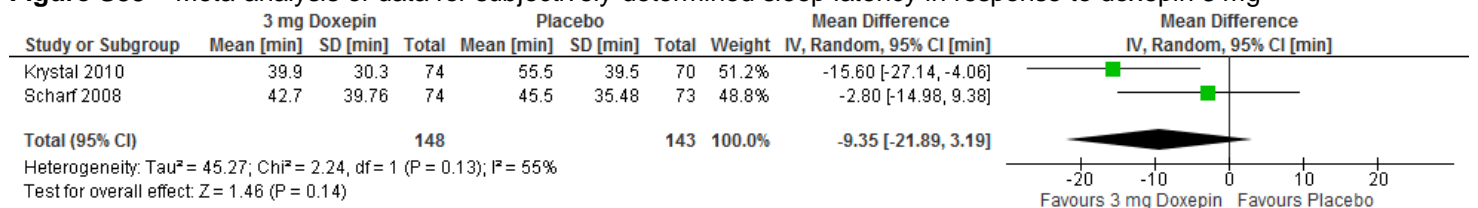

**Figure S54 – Meta-analysis of data for PSG-determined total sleep time in response to doxepin 3 mg**

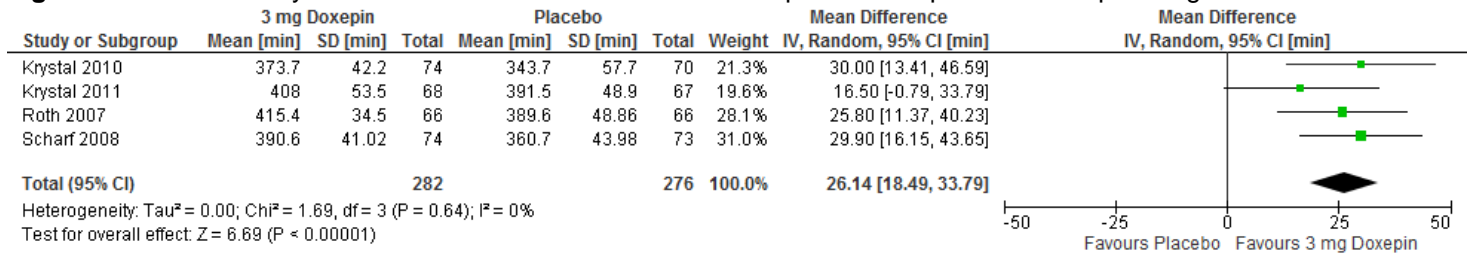

**Figure S55 – Meta-analysis of data for subjectively-determined total sleep time in response to doxepin 3 mg**

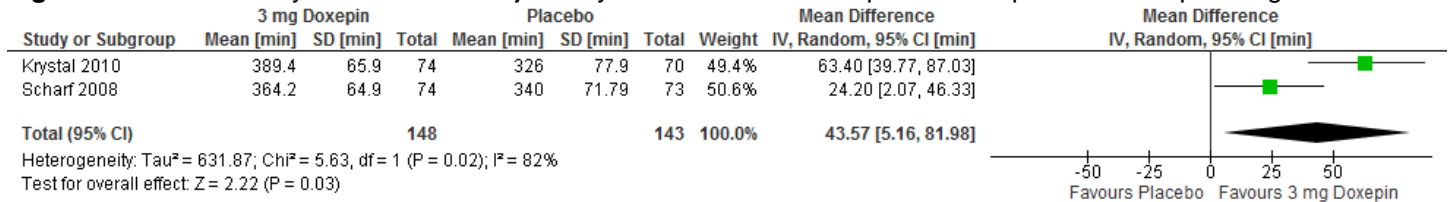

**Figure S56 – Meta-analysis of data for PSG-determined wake after sleep onset in response to doxepin 3 mg**

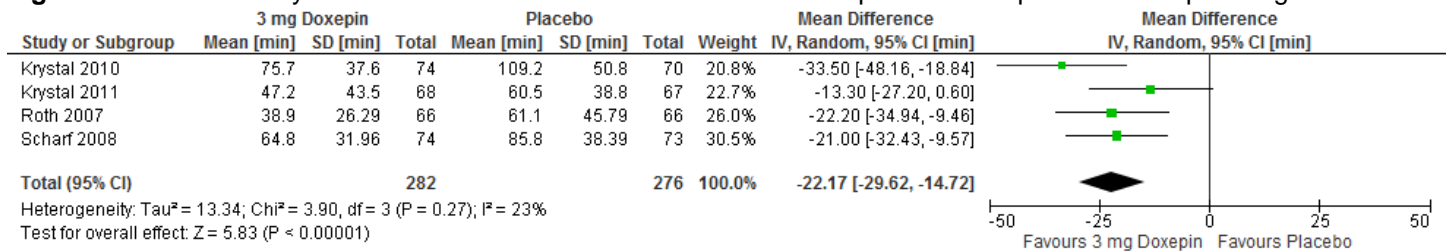

**Figure S57 – Meta-analysis of data for subjectively-determined quality of sleep in response to doxepin 3 mg**

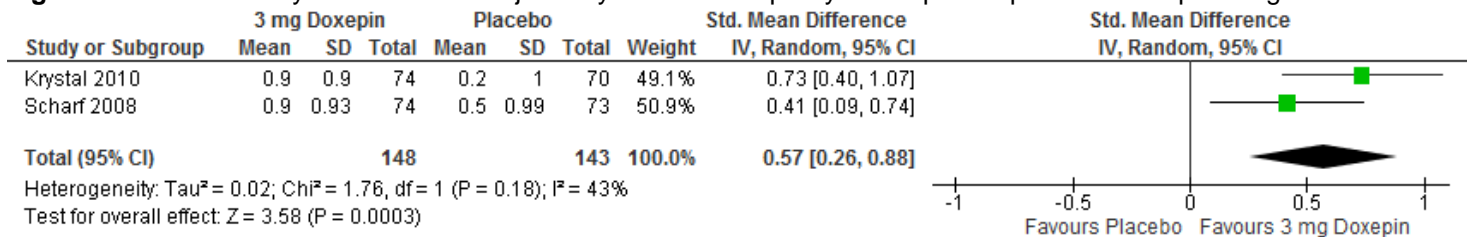

**Figure S58 – Meta-analysis of data for PSG-determined sleep efficiency in response to doxepin 3 mg**

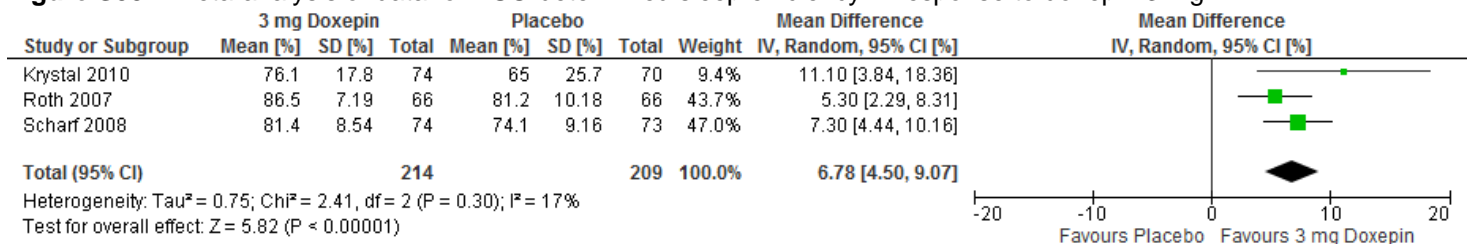

**Figure S59 – Meta-analysis of data for PSG-determined number of awakenings in response to doxepin 3 mg**

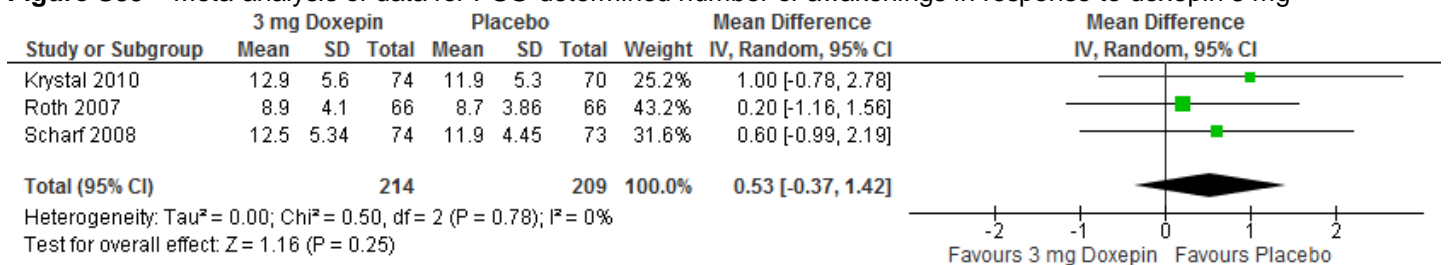

**Figure S60** – Meta-analysis of data for the occurrence of headache in response to doxepin 3 mg

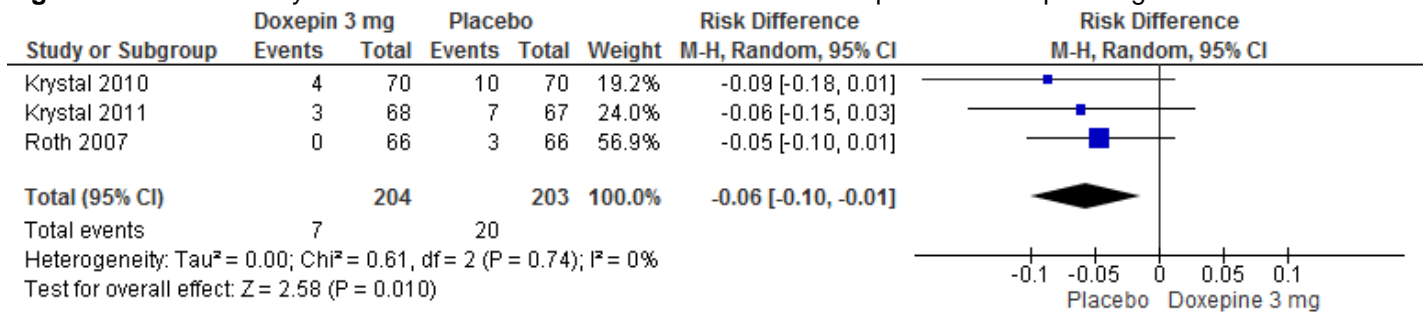

**Figure S61** – Meta-analysis of data for the occurrence of somnolence in response to doxepin 3 mg

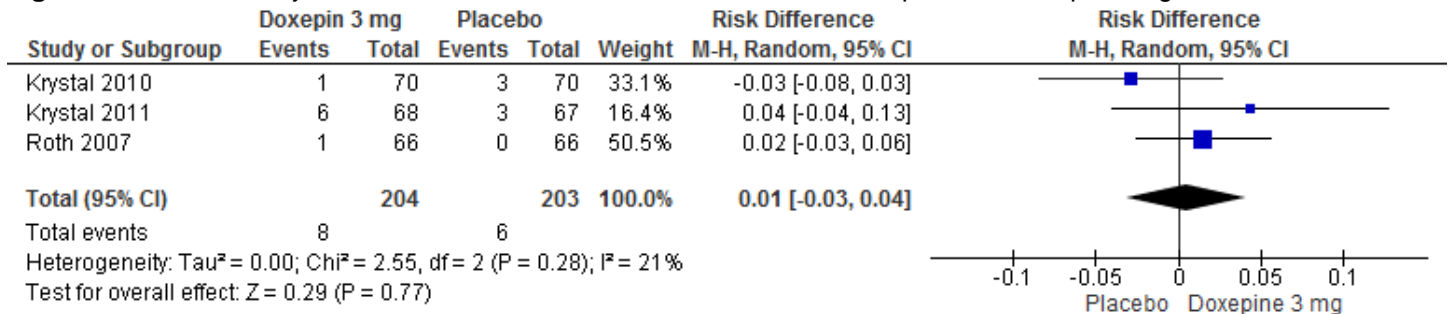

**Figure S62** – Meta-analysis of data for the occurrence of diarrhea in response to doxepin 3 mg

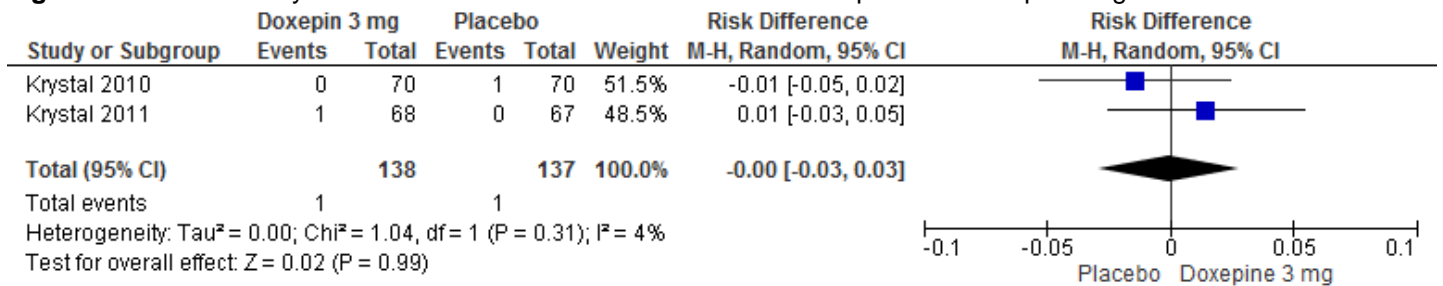

**Figure S63** – Meta-analysis of data for the occurrence of upper respiratory tract infection in response to doxepin 3 mg

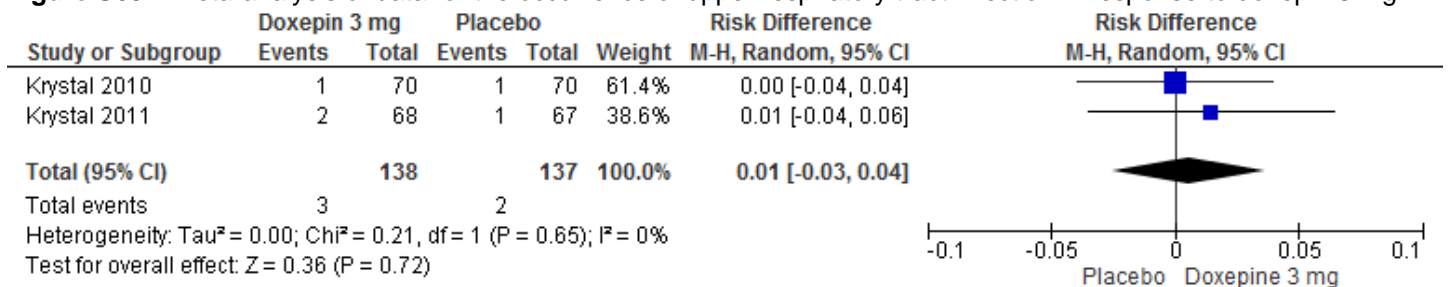

**Table S15** – Summary of Findings table for doxepin 3 mg for the treatment of chronic insomnia

References: Krystal 2010(A); Krystal 2011(B); Roth 2007(C); Scharf 2008(D)

| Outcomes                                      | Quality of the evidence (GRADE)          | Absolute Difference 3 mg Doxepin vs Placebo                                                                          | No of Participants (studies)          |
|-----------------------------------------------|------------------------------------------|----------------------------------------------------------------------------------------------------------------------|---------------------------------------|
| <b>Sleep Latency*</b><br>(PSG)                | ⊕⊕⊕⊖<br><b>moderate</b> <sup>1</sup>     | The mean sleep latency in the doxepin groups was <b>2.3 minutes lower</b><br>(6.22 lower to 1.62 higher)             | 558<br>(4 studies) <sup>A,B,C,D</sup> |
| <b>Sleep Latency</b><br>(Subjective)          | ⊕⊕⊕⊖<br><b>low</b> <sup>1,6</sup>        | The mean sleep latency in the doxepin groups was <b>9.35 minutes lower</b><br>(21.89 lower to 3.19 higher)           | 291<br>(2 studies) <sup>A,D</sup>     |
| <b>Total Sleep Time*</b><br>(PSG)             | ⊕⊕⊕⊖<br><b>low</b> <sup>1,3</sup>        | The mean total sleep time in the doxepin groups was <b>26.14 minutes higher</b><br>(18.49 to 33.79 higher)           | 558<br>(4 studies) <sup>A,B,C,D</sup> |
| <b>Total Sleep Time</b><br>(Subjective)       | ⊕⊖⊖⊖<br><b>very low</b> <sup>1,7,8</sup> | The mean total sleep time in the doxepin groups was <b>43.57 minutes higher</b><br>(5.16 to 81.98 higher)            | 291<br>(2 studies) <sup>A,D</sup>     |
| <b>Wake After Sleep Onset*</b><br>(PSG)       | ⊕⊕⊕⊖<br><b>low</b> <sup>1,2</sup>        | The mean wake after sleep onset in the doxepin groups was <b>22.17 minutes lower</b><br>(29.62 to 14.72 lower)       | 558<br>(4 studies) <sup>A,B,C,D</sup> |
| <b>Wake After Sleep Onset</b><br>(Subjective) | ⊕⊕⊕⊖<br><b>low</b> <sup>1,9</sup>        | The mean wake after sleep onset in the doxepin group was <b>20.0 minutes lower</b><br>(39.07 to 0.92 lower)          | 147<br>(1 study) <sup>D</sup>         |
| <b>Quality of Sleep*</b><br>(Subjective)      | ⊕⊕⊕⊖<br><b>low</b> <sup>1,5</sup>        | The mean quality of sleep in the doxepin groups was <b>0.57 standard deviations higher</b><br>(0.26 to 0.88 higher)  | 291<br>(2 studies) <sup>A,D</sup>     |
| <b>Sleep Efficiency</b><br>(PSG)              | ⊕⊕⊕⊖<br><b>low</b> <sup>1,4</sup>        | The mean sleep efficiency in the doxepin groups was <b>6.78 percent higher</b><br>(4.5 to 9.07 higher)               | 423<br>(3 studies) <sup>A,C,D</sup>   |
| <b>Number of Awakenings</b><br>(PSG)          | ⊕⊕⊕⊖<br><b>moderate</b> <sup>1</sup>     | The mean number of awakenings in the doxepin groups was <b>0.53 awakenings higher</b><br>(0.37 lower to 1.42 higher) | 423<br>(3 studies) <sup>A,C,D</sup>   |

\* Critical Outcome, used to determine Quality of Evidence

<sup>1</sup> All studies funded by Industry

<sup>2</sup> 95% CI (-29.62, -14.72) crosses Clinical Significance (20 min)

<sup>3</sup> 95% CI (18.49, 33.79) crosses Clinical Significance (20 min)

<sup>4</sup> 95% CI (4.50, 9.07) crosses Clinical Significance (5%)

<sup>5</sup> 95% CI (0.26, 0.88) crosses Clinical Significance (SMD 0.5)

<sup>6</sup> 95% CI (-21.89, 3.19) crosses Clinical Significance (20 min)

<sup>7</sup> Heterogeneity (I<sup>2</sup> = 82%) greater than allowance (75%)

<sup>8</sup> 95% CI (5.16, 81.98) crosses Clinical Significance (30 min)

<sup>9</sup> 95% CI (-39.07, -0.92) crosses Clinical Significance (30 min)

**Figure S64** – Meta-analysis of data for PSG-determined sleep latency in response to doxepin 6 mg

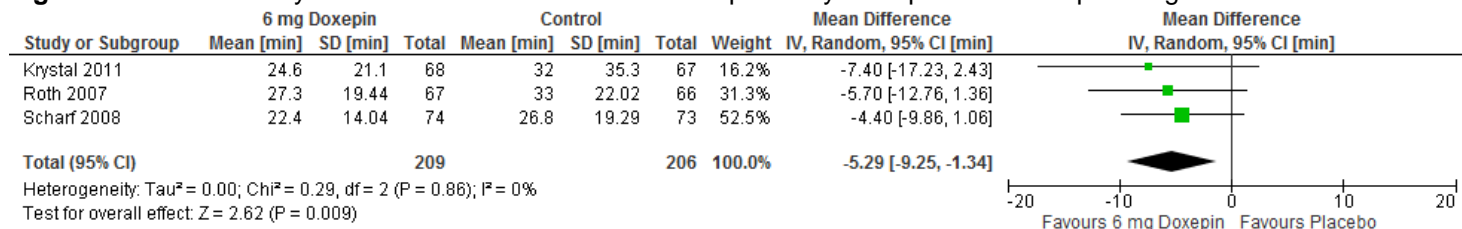

**Figure S65** – Meta-analysis of data for PSG-determined total sleep time in response to doxepin 6 mg

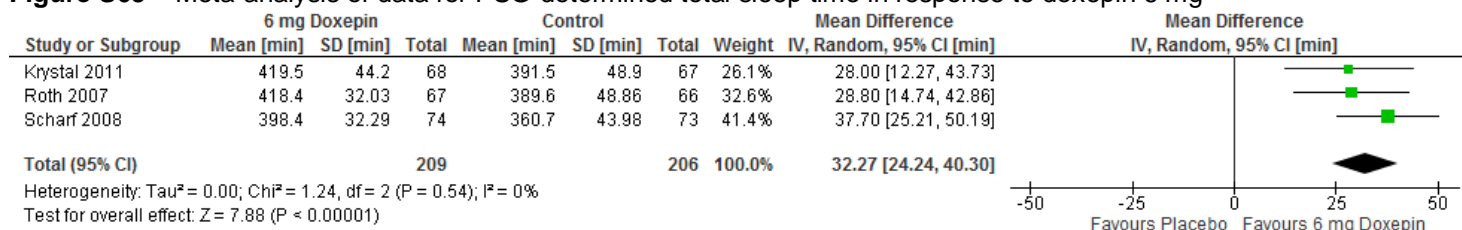

**Figure S66 – Meta-analysis of data for subjectively-determined total sleep time in response to doxepin 6 mg**

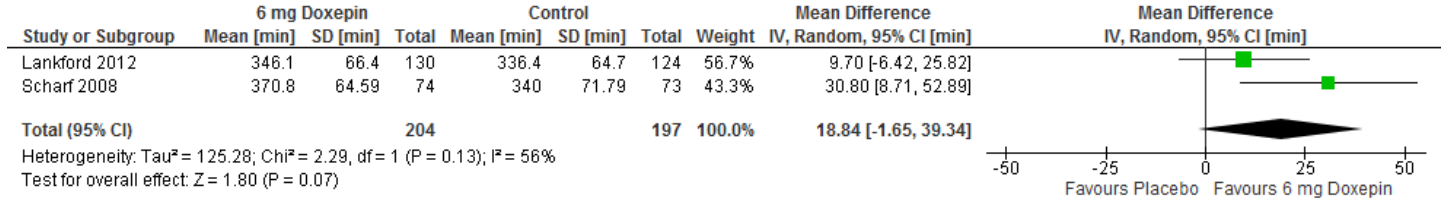

**Figure S67 – Meta-analysis of data for PSG-determined wake after sleep onset in response to doxepin 6 mg**

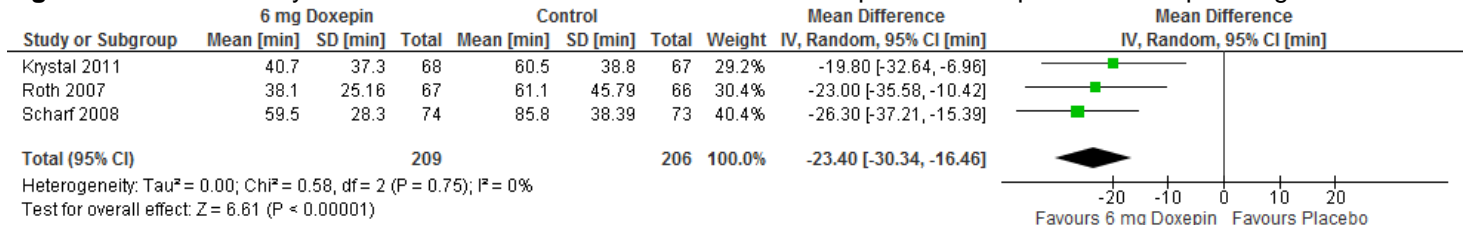

**Figure S68 – Meta-analysis of data for subjectively-determined wake after sleep onset in response to doxepin 6 mg**

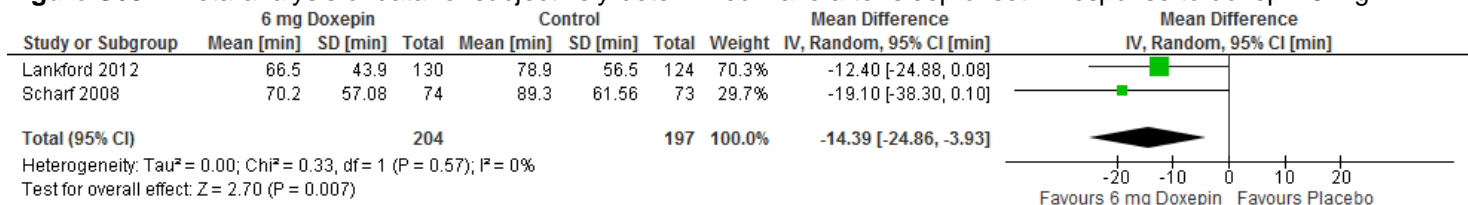

**Figure S69 – Meta-analysis of data for subjectively-determined quality of sleep in response to doxepin 6 mg**

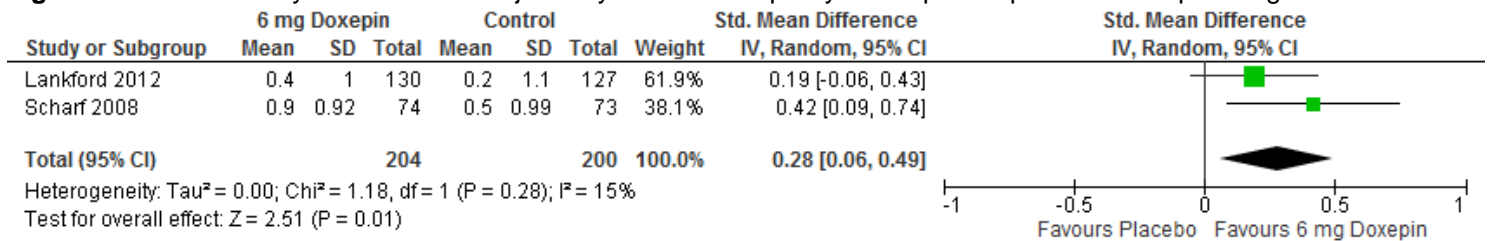

**Figure S70 – Meta-analysis of data for PSG-determined sleep efficiency in response to doxepin 6 mg**

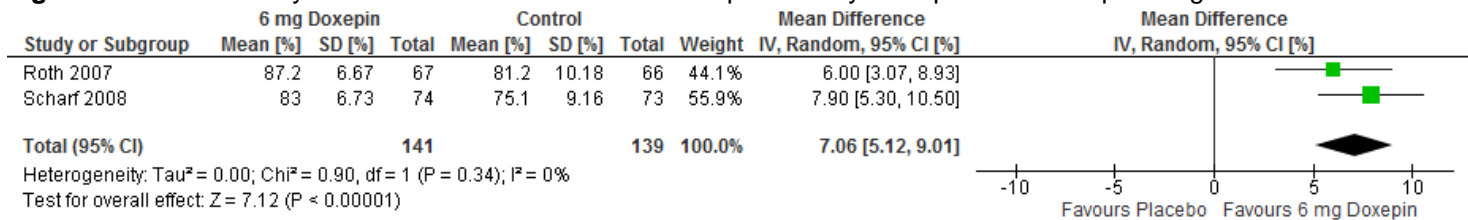

**Figure S71 – Meta-analysis of data for PSG-determined number of awakenings in response to doxepin 6 mg**

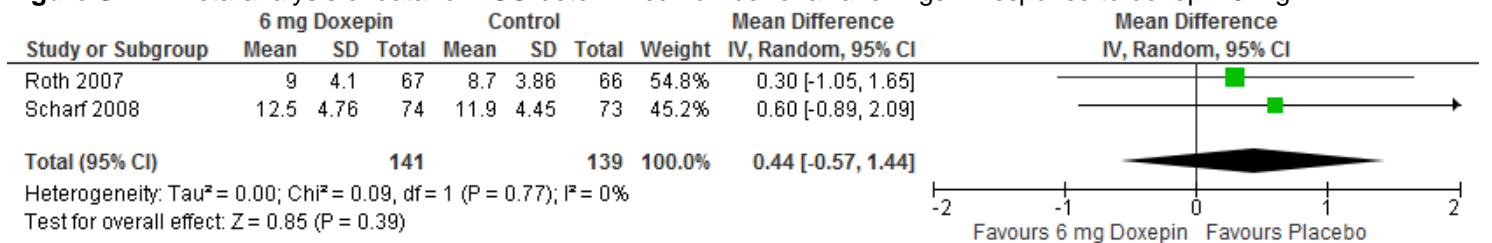

**Figure S72 – Meta-analysis of data for the occurrence of headache in response to doxepin 6 mg**

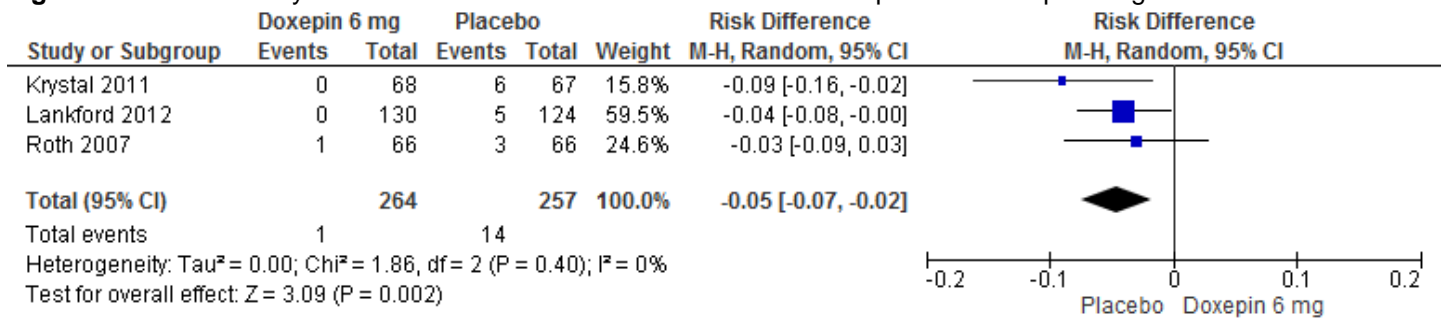

**Figure S73 – Meta-analysis of data for the occurrence of somnolence in response to doxepin 6 mg**

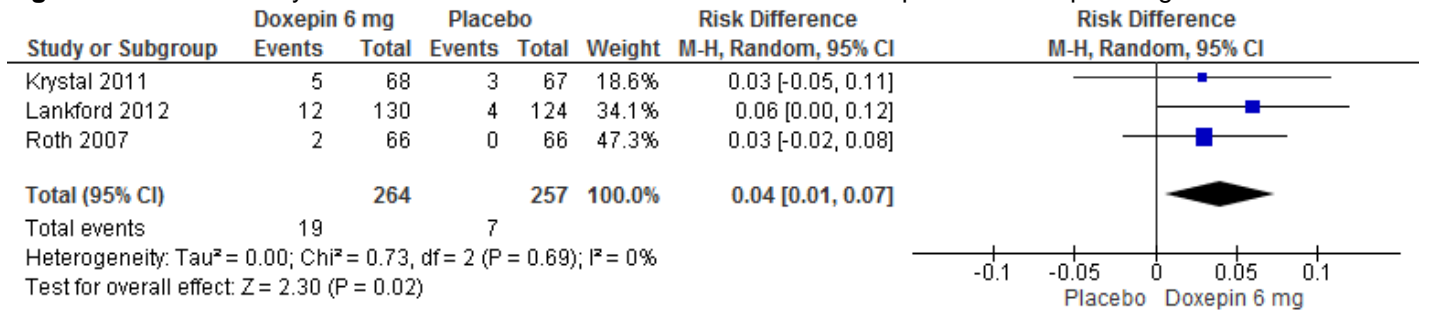

**Table S16 – Summary of Findings table for doxepin 6 mg for the treatment of chronic insomnia**

References: Krystal 2011(A); Roth 2007(B); Lankford 2012(C); Scharf 2008(D)

| Outcomes                                   | Quality of the evidence (GRADE) | Absolute Difference 6 mg Doxepin vs Placebo                                                                       | No of Participants (studies)     |
|--------------------------------------------|---------------------------------|-------------------------------------------------------------------------------------------------------------------|----------------------------------|
| <b>Sleep Latency*</b> (PSG)                | ⊕⊕⊕⊖<br>moderate <sup>1</sup>   | The mean sleep latency in the doxepin groups was <b>5.29 minutes lower</b> (9.25 to 1.34 lower)                   | 415 (3 studies) <sup>A,B,D</sup> |
| <b>Total Sleep Time*</b> (PSG)             | ⊕⊕⊕⊖<br>moderate <sup>1</sup>   | The mean total sleep time in the doxepin groups was <b>32.27 minutes higher</b> (24.24 to 40.3 higher)            | 415 (3 studies) <sup>A,B,D</sup> |
| <b>Total Sleep Time</b> (Subjective)       | ⊕⊕⊖⊖<br>low <sup>1,3</sup>      | The mean total sleep time in the doxepin groups was <b>18.84 minutes higher</b> (1.65 lower to 39.34 higher)      | 401 (2 studies) <sup>C,D</sup>   |
| <b>Wake After Sleep Onset*</b> (PSG)       | ⊕⊕⊖⊖<br>low <sup>1,2</sup>      | The mean wake after sleep onset in the doxepin groups was <b>23.4 minutes lower</b> (30.34 to 16.46 lower)        | 415 (3 studies) <sup>A,B,D</sup> |
| <b>Wake After Sleep Onset</b> (Subjective) | ⊕⊕⊕⊖<br>moderate <sup>1</sup>   | The mean wake after sleep onset in the doxepin groups was <b>14.39 minutes lower</b> (24.86 to 3.93 lower)        | 401 (2 studies) <sup>C,D</sup>   |
| <b>Quality of Sleep*</b> (Subjective)      | ⊕⊕⊕⊖<br>moderate <sup>1</sup>   | The mean quality of sleep in the doxepin groups was <b>0.28 standard deviations higher</b> (0.06 to 0.49 higher)  | 404 (2 studies) <sup>C,D</sup>   |
| <b>Sleep Efficiency</b> (PSG)              | ⊕⊕⊕⊖<br>moderate <sup>1</sup>   | The mean sleep efficiency in the doxepin groups was <b>7.06 percent higher</b> (5.12 to 9.01 higher)              | 280 (2 studies) <sup>B,D</sup>   |
| <b>Number of Awakenings</b> (PSG)          | ⊕⊕⊕⊖<br>moderate <sup>1</sup>   | The mean number of awakenings in the doxepin groups was <b>0.44 awakenings higher</b> (0.57 lower to 1.44 higher) | 280 (2 studies) <sup>B,D</sup>   |

\* Critical Outcome, used to determine Quality of Evidence

<sup>1</sup> All studies funded by industry

<sup>2</sup> 95% CI (-30.34, -16.46) crosses Clinical Significance (20 min)

<sup>3</sup> 95% CI (-1.65, 39.34) crosses Clinical Significance (30 min)

## Trazadone - Summary of Findings Table

**Table S17** – Summary of Findings table for trazadone 50 mg for the treatment of chronic insomnia

References: Walsh 1998(A)

| Outcomes                                       | Quality of the evidence (GRADE)      | Absolute Difference 50 mg Trazadone vs Placebo                                                                 | No of Participants (studies)  |
|------------------------------------------------|--------------------------------------|----------------------------------------------------------------------------------------------------------------|-------------------------------|
| <b>Sleep Latency*</b><br>(Subjective)          | ⊕⊕⊕⊖<br><b>moderate</b> <sup>1</sup> | The mean sleep latency in the trazadone group was <b>10.20 minutes lower</b> (11.44 to 8.95 lower)             | 187<br>(1 study) <sup>A</sup> |
| <b>Total Sleep Time*</b><br>(Subjective)       | ⊕⊕⊕⊖<br><b>moderate</b> <sup>1</sup> | The mean total sleep time in the trazadone group was <b>21.80 minutes higher</b> (20.10 to 23.49 higher)       | 187<br>(1 study) <sup>A</sup> |
| <b>Wake After Sleep Onset*</b><br>(Subjective) | ⊕⊕⊕⊖<br><b>moderate</b> <sup>1</sup> | The mean wake after sleep onset in the trazadone group was <b>7.70 minutes lower</b> (8.89 to 6.5 lower)       | 187<br>(1 study) <sup>A</sup> |
| <b>Quality of Sleep*</b><br>(Subjective)       | ⊕⊕⊕⊖<br><b>moderate</b> <sup>1</sup> | The mean quality of sleep in the trazadone group was <b>0.13 points<sup>2</sup> lower</b> (0.14 to 0.11 lower) | 187<br>(1 study) <sup>A</sup> |
| <b>Number of Awakenings</b><br>(Subjective)    | ⊕⊕⊕⊖<br><b>moderate</b> <sup>1</sup> | The mean number of awakenings in the trazadone group was <b>0.40 awakenings lower</b> (0.42 to 0.37 lower)     | 187<br>(1 study) <sup>A</sup> |

\* Critical Outcome, used to determine Quality of Evidence

<sup>1</sup> Study funded by industry

<sup>2</sup> 4-point scale (1=Excellent, 4=Poor)

## Tiagabine - Meta-Analyses and Summary of Findings Tables

**Figure S74** – Meta-analysis of data for PSG-determined sleep latency in response to tiagabine 4 mg

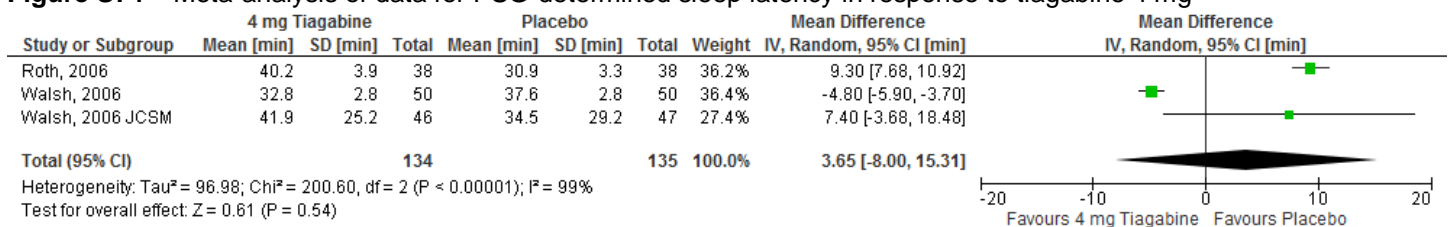

**Figure S75** – Meta-analysis of data for subjectively-determined sleep latency in response to tiagabine 4 mg

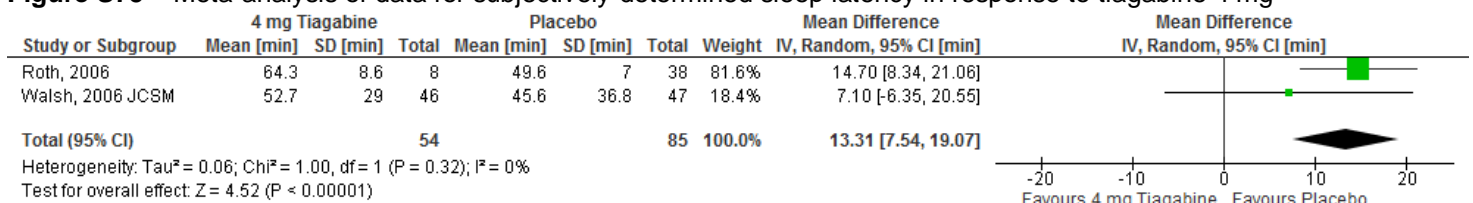

**Figure S76** – Meta-analysis of data for PSG-determined total sleep time in response to tiagabine 4 mg

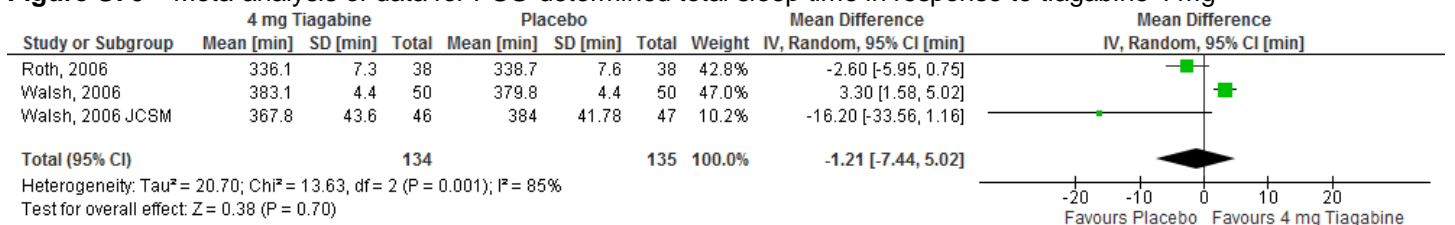

**Figure S77** – Meta-analysis of data for subjectively-determined total sleep time in response to tiagabine 4 mg

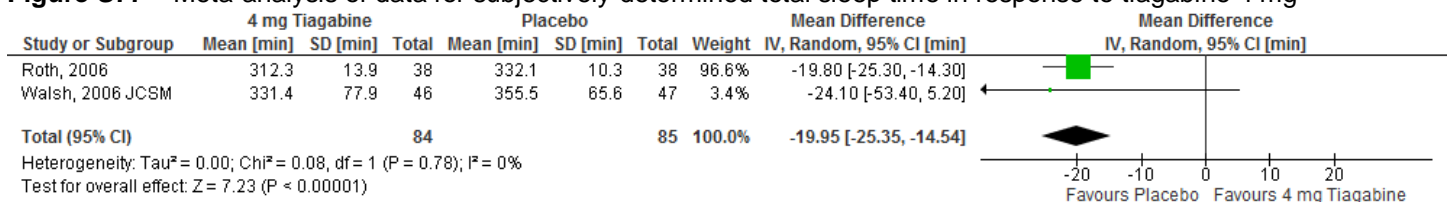

**Figure S78 – Meta-analysis of data for PSG-determined wake after sleep onset in response to tiagabine 4 mg**

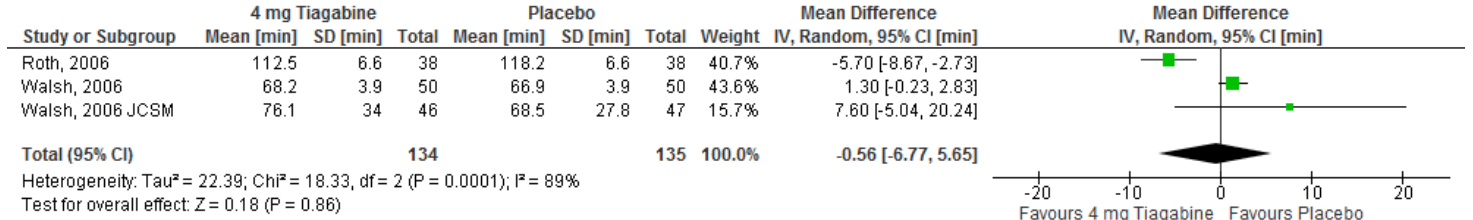

**Figure S79 – Meta-analysis of data for subjectively-determined wake after sleep onset in response to tiagabine 4 mg**

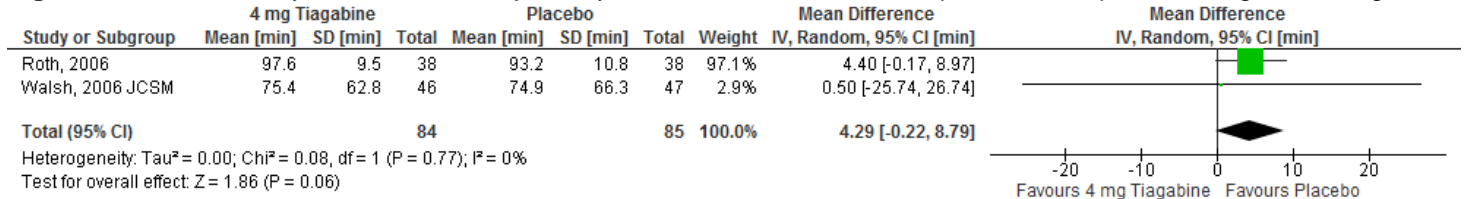

**Figure S80 – Meta-analysis of data for subjectively-determined quality of sleep in response to tiagabine 4 mg**

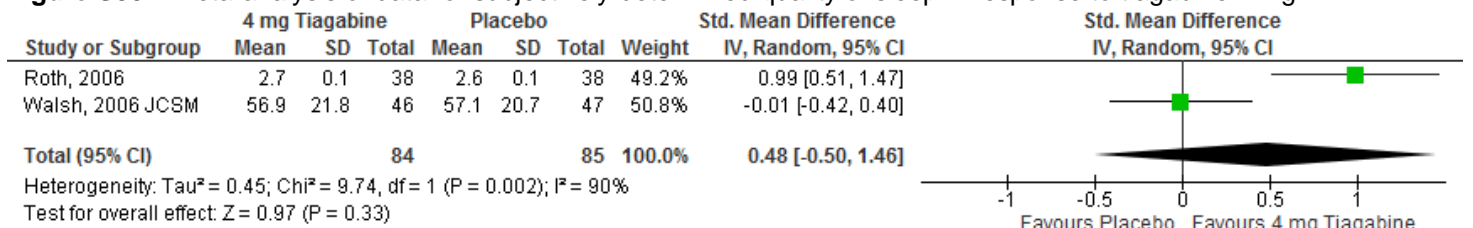

**Figure S81 – Meta-analysis of data for PSG-determined sleep efficiency in response to tiagabine 4 mg**

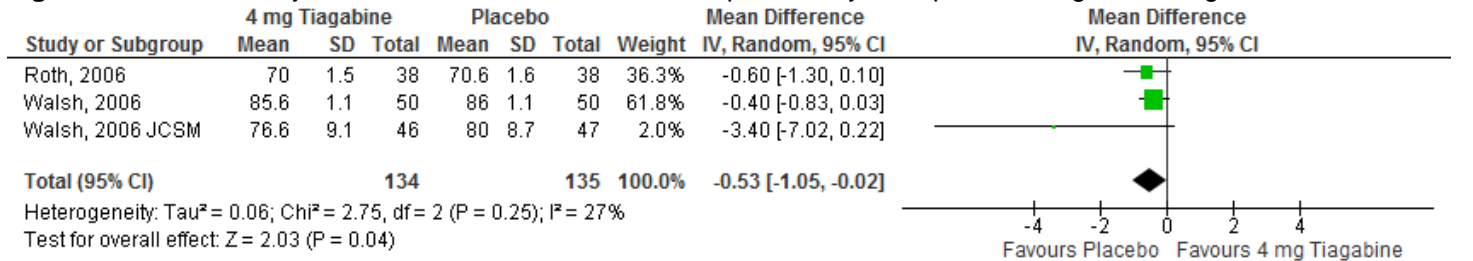

**Figure S82 – Meta-analysis of data for PSG-determined number of awakenings in response to tiagabine 4 mg**

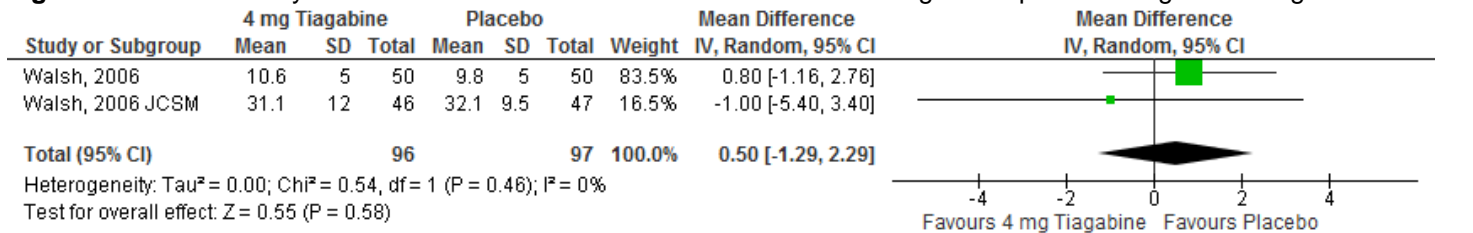

**Figure S83 – Meta-analysis of data for subjectively-determined number of awakenings in response to tiagabine 4 mg**

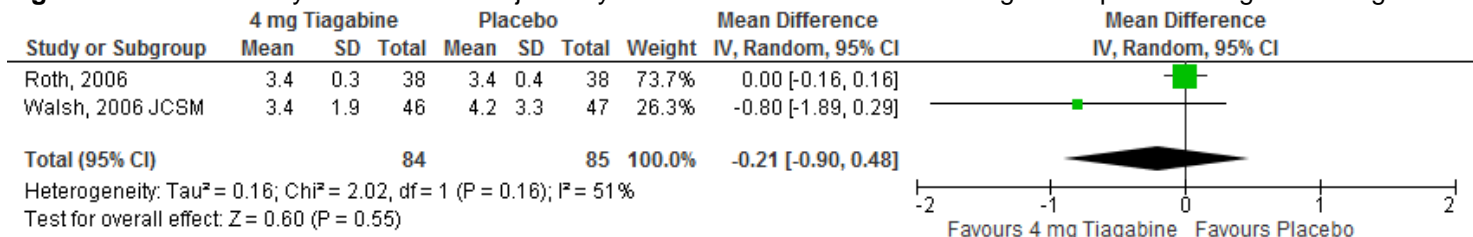



**Figure S84** – Meta-analysis of data for the occurrence of headache in response to tiagabine 4 mg

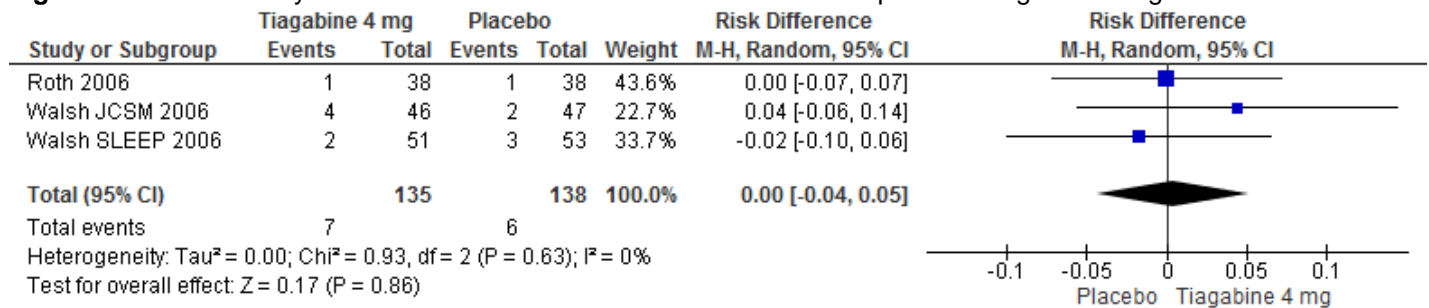

**Figure S85** – Meta-analysis of data for the occurrence of nausea in response to tiagabine 4 mg

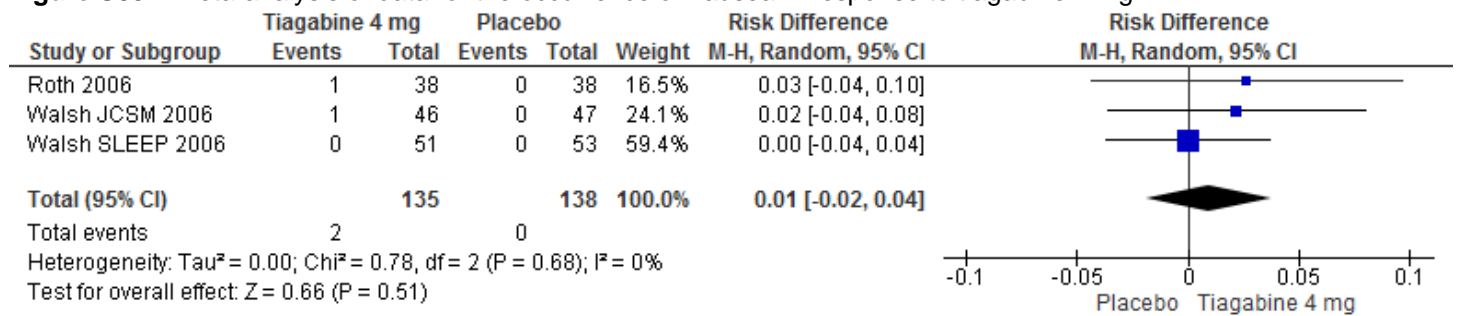

**Table S18 – Summary of Findings table for tiagabine 4 mg for the treatment of chronic insomnia**

References: Roth 2006(A); Walsh 2006(B); Walsh 2006 JCSCM(C)

| Outcomes                                      | Quality of the evidence (GRADE)          | Absolute Difference 4 mg Tiagabine vs Placebo                                                                              | No of Participants (studies)        |
|-----------------------------------------------|------------------------------------------|----------------------------------------------------------------------------------------------------------------------------|-------------------------------------|
| <b>Sleep Latency</b><br>(PSG)                 | ⊕⊖⊖⊖<br><b>very low</b> <sup>1,2,3</sup> | The mean sleep latency in the tiagabine groups was <b>3.65 minutes higher</b><br>(8 lower to 15.31 higher)                 | 269<br>(3 studies) <sup>A,B,C</sup> |
| <b>Sleep Latency</b><br>(Subjective)          | ⊕⊕⊕⊖<br><b>moderate</b> <sup>3</sup>     | The mean sleep latency in the tiagabine groups was <b>13.31 minutes higher</b><br>(7.54 to 19.07 higher)                   | 139<br>(2 studies) <sup>A,C</sup>   |
| <b>Total Sleep Time*</b><br>(PSG)             | ⊕⊕⊖⊖<br><b>low</b> <sup>3,5</sup>        | The mean total sleep time in the tiagabine groups was <b>1.21 minutes lower</b><br>(7.44 lower to 5.02 higher)             | 269<br>(3 studies) <sup>A,B,C</sup> |
| <b>Total Sleep Time</b><br>(Subjective)       | ⊕⊕⊕⊖<br><b>moderate</b> <sup>3</sup>     | The mean total sleep time in the tiagabine groups was <b>19.95 minutes lower</b><br>(25.35 to 14.54 lower)                 | 169<br>(2 studies) <sup>A,C</sup>   |
| <b>Wake After Sleep Onset*</b><br>(PSG)       | ⊕⊕⊖⊖<br><b>low</b> <sup>3,4</sup>        | The mean wake after sleep onset in the tiagabine groups was <b>0.56 minutes lower</b><br>(6.77 lower to 5.65 higher)       | 269<br>(3 studies) <sup>A,B,C</sup> |
| <b>Wake After Sleep Onset</b><br>(Subjective) | ⊕⊕⊕⊖<br><b>moderate</b> <sup>3</sup>     | The mean wake after sleep onset in the tiagabine groups was <b>4.29 minutes higher</b><br>(0.22 lower to 8.79 higher)      | 169<br>(2 studies) <sup>A,C</sup>   |
| <b>Quality of Sleep*</b><br>(Subjective)      | ⊕⊖⊖⊖<br><b>very low</b> <sup>3,7,8</sup> | The mean quality of sleep in the tiagabine groups was <b>0.48 standard deviations higher</b><br>(0.5 lower to 1.46 higher) | 169<br>(2 studies) <sup>A,C</sup>   |
| <b>Sleep Efficiency</b><br>(PSG)              | ⊕⊕⊕⊖<br><b>moderate</b> <sup>3</sup>     | The mean sleep efficiency in the tiagabine groups was <b>0.53 percent lower</b><br>(1.05 to 0.02 lower)                    | 269<br>(3 studies) <sup>A,B,C</sup> |
| <b>Number of Awakenings</b><br>(PSG)          | ⊕⊕⊖⊖<br><b>low</b> <sup>3,6</sup>        | The mean number of awakenings in the tiagabine groups was <b>0.5 awakenings higher</b><br>(1.29 lower to 2.29 higher)      | 193<br>(2 studies) <sup>B,C</sup>   |
| <b>Number of Awakenings</b><br>(Subjective)   | ⊕⊕⊖⊖<br><b>low</b> <sup>3,9</sup>        | The mean number of awakenings in the tiagabine groups was <b>0.21 awakenings lower</b><br>(0.9 lower to 0.48 higher)       | 169<br>(2 studies) <sup>A,C</sup>   |

\* Critical Outcome, used to determine Quality of Evidence

<sup>1</sup> Heterogeneity (I<sup>2</sup> = 99%) greater than allowance (75%)

<sup>2</sup> 95% CI (-8.0, 15.31) crosses Clinical Significance (10 min)

<sup>3</sup> All studies funded by industry

<sup>4</sup> Heterogeneity (I<sup>2</sup> = 89%) greater than allowance (75%)

<sup>5</sup> Heterogeneity (I<sup>2</sup> = 85%) greater than allowance (75%)

<sup>6</sup> 95% CI (-1.29, 2.29) crosses Clinical Significance (2 awakenings)

<sup>7</sup> Heterogeneity (I<sup>2</sup> = 90%) greater than allowance (75%)

<sup>8</sup> 95% CI (-0.50, 1.46) crosses zero standard mean difference

<sup>9</sup> 95% CI (-0.90, 0.48) crosses Clinical Significance (0.5 awakenings)

**Table S19 – Summary of Findings table for tiagabine 6 mg for the treatment of chronic insomnia**

References: Roth 2006(A); Walsh 2006 JCSM(B)

| Outcomes                                   | Quality of the evidence (GRADE)          | Absolute Difference 6 mg Tiagabine vs Placebo                                                                            | No of Participants (studies)   |
|--------------------------------------------|------------------------------------------|--------------------------------------------------------------------------------------------------------------------------|--------------------------------|
| <b>Sleep Latency</b> (PSG)                 | ⊕⊕⊖⊖<br><b>low</b> <sup>3,7</sup>        | The mean sleep latency in the tiagabine groups was <b>6.9 minutes higher</b> (2.22 to 11.58 higher)                      | 175 (2 studies) <sup>A,B</sup> |
| <b>Sleep Latency</b> (Subjective)          | ⊕⊕⊕⊖<br><b>moderate</b> <sup>3</sup>     | The mean sleep latency in the tiagabine groups was <b>5.68 minutes higher</b> (3.05 to 8.3 higher)                       | 175 (2 studies) <sup>A,B</sup> |
| <b>Total Sleep Time*</b> (PSG)             | ⊕⊕⊕⊖<br><b>moderate</b> <sup>3</sup>     | The mean total sleep time in the tiagabine groups was <b>7.17 minutes higher</b> (0.26 lower to 14.59 higher)            | 175 (2 studies) <sup>A,B</sup> |
| <b>Total Sleep Time</b> (Subjective)       | ⊕⊕⊕⊖<br><b>moderate</b> <sup>3</sup>     | The mean total sleep time in the tiagabine groups was <b>9.65 minutes lower</b> (14.05 to 5.25 lower)                    | 175 (2 studies) <sup>A,B</sup> |
| <b>Wake After Sleep Onset*</b> (PSG)       | ⊕⊖⊖⊖<br><b>very low</b> <sup>1,2,3</sup> | The mean wake after sleep onset in the tiagabine groups was <b>9.24 minutes lower</b> (24.78 lower to 6.3 higher)        | 175 (2 studies) <sup>A,B</sup> |
| <b>Wake After Sleep Onset</b> (Subjective) | ⊕⊕⊕⊖<br><b>moderate</b> <sup>3</sup>     | The mean wake after sleep onset in the tiagabine groups was <b>5.68 minutes higher</b> (3.05 to 8.3 higher)              | 175 (2 studies) <sup>A,B</sup> |
| <b>Quality of Sleep*</b> (Subjective)      | ⊕⊕⊖⊖<br><b>low</b> <sup>3,4</sup>        | The mean quality of sleep in the tiagabine groups was <b>0.01 standard deviations higher</b> (0.28 lower to 0.31 higher) | 175 (2 studies) <sup>A,B</sup> |
| <b>Sleep Efficiency</b> (PSG)              | ⊕⊕⊕⊖<br><b>moderate</b> <sup>3</sup>     | The mean sleep efficiency in the tiagabine groups was <b>1.46 percent higher</b> (0.15 lower to 3.06 higher)             | 175 (2 studies) <sup>A,B</sup> |
| <b>Number of Awakenings</b> (Subjective)   | ⊕⊖⊖⊖<br><b>very low</b> <sup>3,5,6</sup> | The mean number of awakenings in the tiagabine groups was <b>0.49 awakenings lower</b> (1.84 lower to 0.87 higher)       | 175 (2 studies) <sup>A,B</sup> |

\* Critical Outcome, used to determine Quality of Evidence

<sup>1</sup> Heterogeneity (I<sup>2</sup> = 81%) crosses threshold (75%)

<sup>2</sup> 95% CI (-24.78, 6.30) crosses Clinical Significance (20 min)

<sup>3</sup> All studies funded by industry

<sup>4</sup> 95% CI (-0.28, 0.31) crosses zero standard mean difference

<sup>5</sup> Heterogeneity (I<sup>2</sup> = 83%) crosses threshold (75%)

<sup>6</sup> 95% CI (-1.84, 0.87) crosses Clinical Significance (0.5 awakenings)

<sup>7</sup> 95% CI (2.22, 11.58) crosses Clinical Significance (10 min)

**Table S20** – Summary of Findings table for tiagabine 8 mg for the treatment of chronic insomnia

References: Roth 2006(A); Walsh 2006(B); Walsh 2006 JCSM(C)

| Outcomes                                   | Quality of the evidence (GRADE)          | Absolute Difference 6 mg Tiagabine vs Placebo                                                                            | No of Participants (studies)     |
|--------------------------------------------|------------------------------------------|--------------------------------------------------------------------------------------------------------------------------|----------------------------------|
| <b>Sleep Latency</b> (PSG)                 | ⊕⊕⊕⊖<br><b>moderate</b> <sup>1</sup>     | The mean sleep latency in the tiagabine groups was <b>1.22 minutes lower</b> (2.66 lower to 0.22 higher)                 | 271 (3 studies) <sup>A,B,C</sup> |
| <b>Sleep Latency</b> (Subjective)          | ⊕⊕⊕⊖<br><b>moderate</b> <sup>1</sup>     | The mean sleep latency in the tiagabine groups was <b>2.12 minutes lower</b> (3.48 to 0.76 lower)                        | 171 (2 studies) <sup>A,C</sup>   |
| <b>Total Sleep Time*</b> (PSG)             | ⊕⊕⊖⊖<br><b>low</b> <sup>1,3</sup>        | The mean total sleep time in the tiagabine groups was <b>3.49 minutes higher</b> (6.43 lower to 13.42 higher)            | 271 (3 studies) <sup>A,B,C</sup> |
| <b>Total Sleep Time</b> (Subjective)       | ⊕⊖⊖⊖<br><b>very low</b> <sup>1,7,8</sup> | The mean total sleep time in the tiagabine groups was <b>16.09 minutes lower</b> (44.97 lower to 12.79 higher)           | 171 (2 studies) <sup>A,C</sup>   |
| <b>Wake After Sleep Onset*</b> (PSG)       | ⊕⊕⊖⊖<br><b>low</b> <sup>1,2</sup>        | The mean wake after sleep onset in the tiagabine groups was <b>2.42 minutes lower</b> (10.35 lower to 5.51 higher)       | 271 (3 studies) <sup>A,B,C</sup> |
| <b>Wake After Sleep Onset</b> (Subjective) | ⊕⊕⊕⊖<br><b>moderate</b> <sup>1</sup>     | The mean wake after sleep onset in the tiagabine groups was <b>9.71 minutes higher</b> (5.7 to 13.72 higher)             | 171 (2 studies) <sup>A,C</sup>   |
| <b>Quality of Sleep*</b> (Subjective)      | ⊕⊖⊖⊖<br><b>very low</b> <sup>1,5,6</sup> | The mean quality of sleep in the tiagabine groups was <b>0.37 standard deviations higher</b> (0.65 lower to 1.39 higher) | 171 (2 studies) <sup>A,C</sup>   |
| <b>Sleep Efficiency</b> (PSG)              | ⊕⊕⊖⊖<br><b>low</b> <sup>1,3</sup>        | The mean sleep efficiency in the tiagabine groups was <b>0.68 percent higher</b> (1.41 lower to 2.76 higher)             | 271 (3 studies) <sup>A,B,C</sup> |
| <b>Number of Awakenings</b> (PSG)          | ⊕⊕⊖⊖<br><b>low</b> <sup>1,4</sup>        | The mean number of awakenings in the tiagabine groups was <b>0.88 awakenings lower</b> (3.7 lower to 1.95 higher)        | 192 (2 studies) <sup>B,C</sup>   |
| <b>Number of Awakenings</b> (Subjective)   | ⊕⊕⊖⊖<br><b>low</b> <sup>1,9</sup>        | The mean number of awakenings in the tiagabine groups was <b>0.3 awakenings higher</b> (0.38 lower to 0.98 higher)       | 171 (2 studies) <sup>A,C</sup>   |

\* Critical Outcome, used to determine Quality of Evidence

<sup>1</sup> All studies funded by industry

<sup>2</sup> Heterogeneity (I<sup>2</sup> = 93%) greater than allowance (75%)

<sup>3</sup> Heterogeneity (I<sup>2</sup> = 94%) greater than allowance (75%)

<sup>4</sup> 95% CI (-3.70, 1.95) crosses Clinical Significance (2 awakenings)

<sup>5</sup> Heterogeneity (I<sup>2</sup> = 91%) greater than allowance (75%)

<sup>6</sup> 95% CI (-0.65, 1.39) crosses zero standard mean difference

<sup>7</sup> Heterogeneity (I<sup>2</sup> = 89%) greater than allowance (75%)

<sup>8</sup> 95% CI (-44.97, 12.79) crosses Clinical Significance

<sup>9</sup> 95% CI (-0.38, 0.98) crosses Clinical Significance (0.5 awakenings)

## Diphenhydramine - Meta-Analyses and Summary of Findings Table

**Figure S86** – Meta-analysis of data for subjectively-determined sleep latency in response to diphenhydramine 50 mg

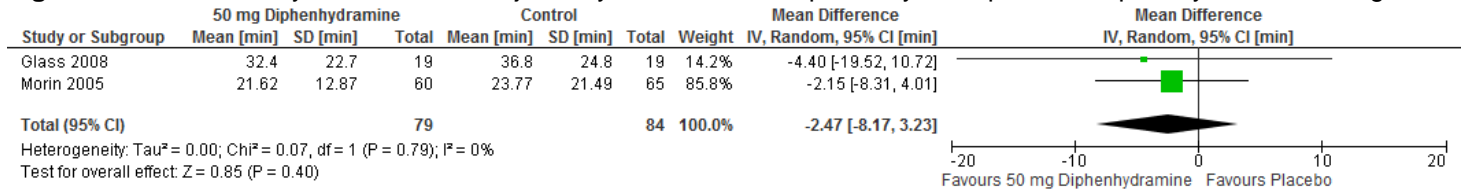

**Figure S87** – Meta-analysis of data for subjectively-determined total sleep time in response to diphenhydramine 50 mg

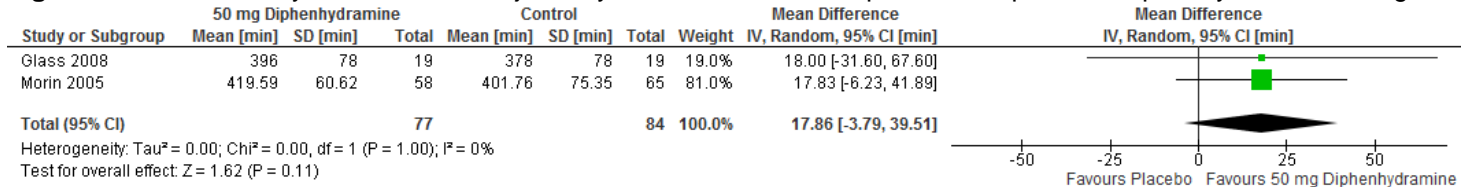

**Table S21** – Summary of Findings table for diphenhydramine 50 mg for the treatment of chronic insomnia

References: Glass 2008(A); Morin 2005(B)

| Outcomes                                    | Quality of the evidence (GRADE)      | Absolute Difference<br>50 mg Diphenhydramine vs Placebo                                                                        | No of Participants (studies)      |
|---------------------------------------------|--------------------------------------|--------------------------------------------------------------------------------------------------------------------------------|-----------------------------------|
| <b>Sleep Latency*</b><br>(PSG)              | ⊕⊕⊖⊖<br><b>low</b> <sup>5,7</sup>    | The mean sleep latency in the diphenhydramine group was <b>7.89 minutes lower</b><br>(17.40 lower to 1.62 higher)              | 52<br>(1 study) <sup>A</sup>      |
| <b>Sleep Latency</b><br>(Subjective)        | ⊕⊕⊖⊖<br><b>low</b> <sup>1,2</sup>    | The mean sleep latency in the diphenhydramine groups was <b>2.47 minutes lower</b><br>(8.17 lower to 3.23 higher)              | 163<br>(2 studies) <sup>A,B</sup> |
| <b>Total Sleep Time*</b><br>(PSG)           | ⊕⊕⊖⊖<br><b>low</b> <sup>5,8</sup>    | The mean total sleep time in the diphenhydramine group was <b>12.37 minutes higher</b><br>(13.38 lower to 38.12 higher)        | 52<br>(1 study) <sup>A</sup>      |
| <b>Total Sleep Time</b><br>(Subjective)     | ⊕⊕⊖⊖<br><b>low</b> <sup>1,2</sup>    | The mean total sleep time in the diphenhydramine groups was <b>17.86 minutes higher</b><br>(3.79 lower to 39.51 higher)        | 161<br>(2 studies) <sup>A,B</sup> |
| <b>Quality of Sleep*</b><br>(Subjective)    | ⊕⊕⊕⊖<br><b>moderate</b> <sup>5</sup> | The mean quality of sleep in the diphenhydramine group was <b>0.1 points<sup>9</sup> higher</b><br>(0.45 lower to 0.65 higher) | 38<br>(1 study) <sup>A</sup>      |
| <b>Sleep Efficiency</b><br>(PSG)            | ⊕⊕⊖⊖<br><b>low</b> <sup>4,5</sup>    | The mean sleep efficiency in the diphenhydramine group was <b>2.59 percent higher</b><br>(3.25 lower to 8.43 higher)           | 52<br>(1 study) <sup>B</sup>      |
| <b>Sleep Efficiency</b><br>(Subjective)     | ⊕⊕⊕⊖<br><b>moderate</b> <sup>5</sup> | The mean sleep efficiency in the diphenhydramine group was <b>4.61 percent higher</b><br>(1.33 to 7.88 higher)                 | 123<br>(1 study) <sup>A</sup>     |
| <b>Number of Awakenings</b><br>(Subjective) | ⊕⊕⊕⊖<br><b>moderate</b> <sup>3</sup> | The mean number of awakenings in the diphenhydramine group was <b>0.3 awakenings lower</b><br>(1.03 lower to 0.43 higher)      | 38<br>(1 study) <sup>A</sup>      |

\* Critical Outcome, used to determine Quality of Evidence

<sup>1</sup> SL and TST 95% CI cross Clinical Significance

<sup>2</sup> 1 of 2 studies funded by industry

<sup>3</sup> 95% CI (-1.03, 0.43) crosses Clinical Significance (0.5 awakenings)

<sup>4</sup> 95% CI (-3.25, 8.43) crosses Clinical Significance (5%)

<sup>5</sup> Study funded by industry

<sup>6</sup> 95% CI (-0.45, 0.65) crosses zero standard mean difference

<sup>7</sup> 95% CI (-17.4, 1.62) crosses Clinical Significance (10 minutes)

<sup>8</sup> 95% CI (-13.38, 38.12) crosses Clinical Significance (20 minutes)

<sup>9</sup> 5-point scale (higher score indicates better sleep quality)

## Melatonin - Meta-Analyses and Summary of Findings Tables

**Figure S88** – Meta-analysis of data for subjectively-determined quality of sleep in response to melatonin 2 mg

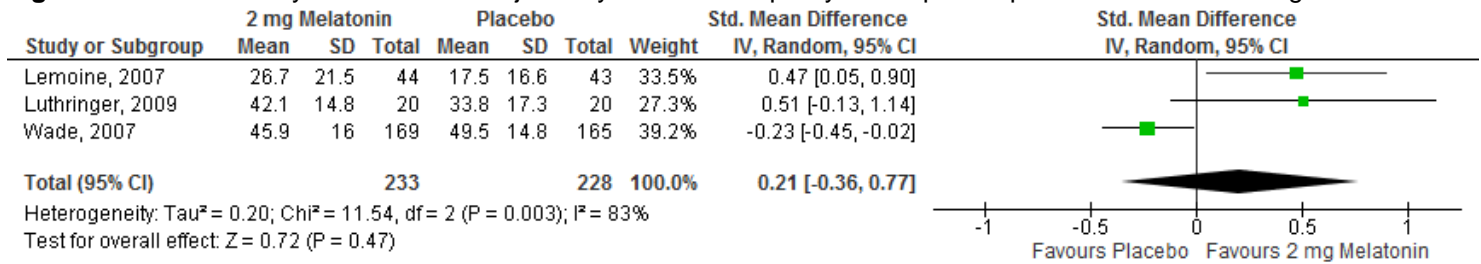

**Table S22** – Summary of Findings table for melatonin 2 mg for the treatment of chronic insomnia

References: Lemoine 2007(A); Luthringer 2009(B); Wade 2007(C)

| Outcomes                                 | Quality of the evidence (GRADE)          | Absolute Difference<br>2 mg Melatonin vs Placebo                                                                           | No of Participants (studies)        |
|------------------------------------------|------------------------------------------|----------------------------------------------------------------------------------------------------------------------------|-------------------------------------|
| <b>Sleep Latency*</b><br>(PSG)           | ⊕⊕⊖⊖<br><b>low</b> <sup>3,4</sup>        | The mean sleep latency in the melatonin group was <b>8.9 minutes lower</b><br>(15.45 to 2.35 lower)                        | 40<br>(1 study) <sup>B</sup>        |
| <b>Total Sleep Time</b><br>(PSG)         | ⊕⊖⊖⊖<br><b>very low</b> <sup>3,6</sup>   | The mean total sleep time in the melatonin group was <b>2.2 minutes higher</b><br>(19.13 lower to 23.53 higher)            | 40<br>(1 study) <sup>B</sup>        |
| <b>Wake After Sleep Onset</b><br>(PSG)   | ⊕⊕⊖⊖<br><b>low</b> <sup>3,5</sup>        | The mean wake after sleep onset in the melatonin group was <b>8.5 minutes higher</b><br>(11.75 lower to 28.75 higher)      | 40<br>(1 study) <sup>B</sup>        |
| <b>Quality of Sleep*</b><br>(Subjective) | ⊕⊖⊖⊖<br><b>very low</b> <sup>1,2,3</sup> | The mean quality of sleep in the melatonin group was <b>0.21 standard deviations higher</b><br>(0.36 lower to 0.77 higher) | 461<br>(3 studies) <sup>A,B,C</sup> |
| <b>Number of Awakenings</b><br>(PSG)     | ⊕⊖⊖⊖<br><b>very low</b> <sup>3,7</sup>   | The mean number of awakenings in the melatonin group was <b>1.4 awakenings higher</b><br>(4.59 lower to 7.39 higher)       | 40<br>(1 study) <sup>B</sup>        |

\* Critical Outcome, used to determine Quality of Evidence

<sup>1</sup> Heterogeneity (I<sup>2</sup> = 83%) greater than allowance (75%)

<sup>2</sup> 95% CI (-0.36, 0.77) crosses zero standard mean difference

<sup>3</sup> All studies funded by industry

<sup>4</sup> 95% CI (-15.45, -2.35) crosses Clinical Significance (10 min)

<sup>5</sup> 95% CI (-11.75, 28.75) crosses Clinical Significance (20 min)

<sup>6</sup> 95% CI (-19.13, 23.53) crosses Clinical Significance (20 min)

<sup>7</sup> 95% CI (-4.59, 7.39) crosses Clinical Significance

## L-tryptophan - Summary of Findings Table

**Table S23** – Summary of Findings table for L-tryptophan 250 mg for the treatment of chronic insomnia

Reference: Hudson 2005

| Outcomes                                       | Quality of the evidence (GRADE)      | Absolute Difference<br>250 mg Tryptophan vs Placebo                                                                   | No of Participants (studies) |
|------------------------------------------------|--------------------------------------|-----------------------------------------------------------------------------------------------------------------------|------------------------------|
| <b>Wake After Sleep Onset*</b><br>(Subjective) | ⊕⊕⊕⊕<br><b>high</b>                  | The mean wake after sleep onset in the Tryptophan groups was <b>9.70 minutes lower</b><br>(15.21 to 4.18 lower)       | 31<br>(1 study)              |
| <b>Total Sleep Time</b><br>(Subjective)        | ⊕⊕⊕⊖ <sup>1</sup><br><b>moderate</b> | The mean total sleep time in the Tryptophan groups was <b>20.00 minutes lower</b><br>(31.29 to 8.7 lower)             | 32<br>(1 study)              |
| <b>Quality of Sleep*</b><br>(Subjective)       | ⊕⊕⊕⊕<br><b>high</b>                  | The mean quality of sleep in the Tryptophan groups was <b>0.30 points<sup>2</sup> higher</b><br>(0.22 to 0.37 higher) | 32<br>(1 study)              |
| <b>Sleep Efficiency</b><br>(Subjective)        | ⊕⊕⊕⊕<br><b>high</b>                  | The mean sleep efficiency in the Tryptophan groups was <b>2.20 percent lower</b><br>(4.27 to 0.12 lower)              | 32<br>(1 study)              |

\* Critical Outcome, used to determine Quality of Evidence

<sup>1</sup> 95% CI (8.7, 31.29) crosses Clinical Significance (30 min)

<sup>2</sup> 3-point scale (Sleep Quality index: 1=low, 3=high)

## Valerian - Summary of Findings Table

**Table S24** – Summary of Findings table for valerian for the treatment of chronic insomnia

References: Morin 2005(A)

| Outcomes                                | Quality of the evidence (GRADE)        | Absolute Difference Valerian-hops vs Placebo                                                                           | No of Participants (studies)  |
|-----------------------------------------|----------------------------------------|------------------------------------------------------------------------------------------------------------------------|-------------------------------|
| <b>Sleep Latency*</b><br>(PSG)          | ⊕⊕⊖⊖<br><b>low</b> <sup>1,2</sup>      | The mean sleep latency in the Valerian-hops groups was <b>9.29 minutes lower</b><br>(18.3 to 0.27 lower)               | 48<br>(1 study) <sup>A</sup>  |
| <b>Sleep Latency</b><br>(Subjective)    | ⊕⊕⊕⊖<br><b>moderate</b> <sup>2</sup>   | The mean sleep latency in the Valerian-hops groups was <b>3.77 minutes higher</b><br>(4.47 lower to 12.01 higher)      | 124<br>(1 study) <sup>A</sup> |
| <b>Total Sleep Time</b><br>(PSG)        | ⊕⊖⊖⊖<br><b>very low</b> <sup>2,3</sup> | The mean total sleep time in the Valerian-hops groups was <b>10.96 minutes higher</b><br>(21.67 lower to 43.59 higher) | 48<br>(1 study) <sup>A</sup>  |
| <b>Total Sleep Time</b><br>(Subjective) | ⊕⊕⊕⊖<br><b>moderate</b> <sup>2</sup>   | The mean total sleep time in the Valerian-hops groups was <b>3.12 minutes higher</b><br>(22.08 lower to 28.32 higher)  | 123<br>(1 study) <sup>A</sup> |
| <b>Sleep Efficiency</b><br>(PSG)        | ⊕⊖⊖⊖<br><b>very low</b> <sup>2,4</sup> | The mean sleep efficiency in the Valerian-hops groups was <b>0.96 percent higher</b><br>(5.02 lower to 6.94 higher)    | 48<br>(1 study) <sup>A</sup>  |
| <b>Sleep Efficiency</b><br>(Subjective) | ⊕⊕⊕⊖<br><b>moderate</b> <sup>2</sup>   | The mean sleep efficiency in the Valerian-hops groups was <b>1.85 percent higher</b><br>(1.9 lower to 5.6 higher)      | 123<br>(1 study) <sup>A</sup> |

\* Critical Outcome, used to determine Quality of Evidence

<sup>1</sup> 95% CI (-18.3, -0.27) crosses Clinical Significance (10 min)

<sup>2</sup> Study funded by industry

<sup>3</sup> 95% CI (-21.67, 43.59) crosses Clinical Significance (20 min)

<sup>4</sup> 95% CI (-5.02, 6.94) crosses Clinical Significance (5%)
